# Supplementary material for: Multiple Immune Factors Are Involved in Controlling Acute and Chronic Chikungunya Virus Infection
Source: PubMed Central journal article supplement (PMC4256279; doi:10.1371/journal.pntd.0003354), 2014-12-04

**Table S1.** The effect of age of mice within a 6-12 week old age range on peak foot swelling day 6. None of the groups were significantly different. The same virus batch was used for all experiments.

| <b>Age or age range, weeks</b> | <b>n (feet)</b> | <b>Day 6 % increase in foot swelling <math>\pm</math> SE</b> |
|--------------------------------|-----------------|--------------------------------------------------------------|
| 6                              | 8               | 53.3 $\pm$ 8.1                                               |
| 6.5                            | 6               | 46.5 $\pm$ 12.4                                              |
| 6 - 10                         | 8               | 50 $\pm$ 6.9                                                 |
| 8 - 12                         | 10              | 48 $\pm$ 4.9                                                 |
| 11 - 12                        | 10              | 59.6 $\pm$ 16.4                                              |

**Table S2.** List of all the mice strains used in the current study

| Mice strain           | Nomenclature                                                        | Description                                                                                                                                                                 |
|-----------------------|---------------------------------------------------------------------|-----------------------------------------------------------------------------------------------------------------------------------------------------------------------------|
| C57BL/6               | C57BL/6                                                             | Wild-type C57BL/6 mice                                                                                                                                                      |
| NOD                   | NOD/ShiLtJ                                                          | Non-obese diabetic mouse produced by inbreeding of Cataract Shinogi strain.                                                                                                 |
| MHC-II <sup>Δ/Δ</sup> | B6.129S2- <i>H2<sup>dIAb1-Ea</sup>/J</i>                            | MHC II deficient C57/BL6 mice designed via targeted deletion of 78.8 kb MHC class II genes ( <i>H2-Ab1</i> , <i>H2-Aa</i> , <i>H2-Eb1</i> , <i>H2-Eb2</i> , <i>H2-Ea</i> ). |
| μMT                   | B6.129S2- <i>Igh-6<sup>tm1Cgn</sup>/J</i>                           | B cells deficient C57/B6 mice designed via targeted disruption of the membrane exon of the immunoglobulin μ chain gene.                                                     |
| Rag-1 <sup>-/-</sup>  | B6.129S7- <i>Rag1<sup>tm1Mom</sup>/J</i>                            | B and T cells deficient C57/BL6 mice designed via targeted mutation of <i>Rag1<sup>tm1Mom</sup></i> .                                                                       |
| Rag2/Il2rg            | B6. <i>Rag2<sup>tm1Fwa</sup>Il2rg<sup>tm1Wjl</sup></i>              | B, T and NK cells deficient C57/BL6 mice designed by crossing Rag2 <sup>-/-</sup> mice and Il2rg <sup>-/-</sup> mice.                                                       |
| NRG                   | NOD.Cg- <i>Rag1<sup>tm1Mom</sup><br/>Il2rg<sup>tm1Wjl</sup>/SzJ</i> | B, T and NK cell deficient NOD-congenic mice designed via targeted mutation of <i>Rag1<sup>null</sup></i> mutation and the <i>IL2rγ<sup>null</sup></i> mutation.            |
| FcγR <sup>-/-</sup>   | B6.129P2- <i>Fcer1g<sup>tm1Rav</sup></i> N12                        | FcγRIII and FcεRI deficient C57/BL6 mice designed via targeted mutation of <i>Fcer1g<sup>tm1Rav</sup></i>                                                                   |

Table S3

| probeset_id | Probeset Type (mouse) | Symbol (mouse) | Description (mouse)                                               | Synonyms (mouse)                                                   | Type of gene (mouse) | DAY 0 | DAY 0 | DAY 30 | DAY 30 | d30_vs_d0 (p-value) | Mean d0 | Mean d30 | log2fold-change | fold change |
|-------------|-----------------------|----------------|-------------------------------------------------------------------|--------------------------------------------------------------------|----------------------|-------|-------|--------|--------|---------------------|---------|----------|-----------------|-------------|
| 10531407    | GeneSymbol            | Cxcl9          | chemokine (C-X-C motif) ligand 9                                  | BB139920[CMK][Mlg][Scyb9][crg-10]                                  | protein-coding       | 6.55  | 6.65  | 10.47  | 9.95   | 0.0053              | 6.6     | 10.21    | 3.61            | 12.21       |
| 10455961    | GeneSymbol            | Ilgp1          | interferon inducible GTPase 1                                     | 2900074L10Rik A1046432 AW111922 Ilgp1 Irgp6                        | protein-coding       | 5.49  | 5.39  | 8.49   | 7.85   | 0.0138              | 5.44    | 8.17     | 2.73            | 6.63        |
| 10385518    | GeneAccession         | Tgtp1          | T-cell specific GTPase 1                                          | Gtp2 Irgb6 Mg21 Tgtp                                               | protein-coding       | 6.11  | 6.32  | 8.93   | 8.56   | 0.0070              | 6.215   | 8.745    | 2.53            | 5.78        |
| 10496592    | GeneSymbol            | Gbp2           | guanylate binding protein 2                                       | -                                                                  | protein-coding       | 6.83  | 6.39  | 9.82   | 8.76   | 0.0429              | 6.61    | 9.29     | 2.68            | 6.41        |
| 10385533    | GeneAccession         | Tgtp1          | T-cell specific GTPase 1                                          | Gtp2 Irgb6 Mg21 Tgtp                                               | protein-coding       | 6.01  | 6.34  | 8.96   | 8.3    | 0.0218              | 6.175   | 8.63     | 2.455           | 5.48        |
| 10455967    | GeneSymbol            | Gbp4           | guanylate binding protein 4                                       | AW228052 KIAA4245 Mag-2 Mpa-2 Mpa2 mKIAA44245                      | protein-coding       | 6.32  | 6.3   | 9.11   | 8.34   | 0.0245              | 6.31    | 8.725    | 2.415           | 5.33        |
| 10455954    | GeneSymbol            | Gm4951         | predicted gene 4951                                               | EG240327                                                           | protein-coding       | 5.48  | 5.37  | 7.59   | 6.93   | 0.0317              | 5.425   | 7.261    | 1.835           | 3.57        |
| 10509635    | GeneSymbol            | Ccr5           | chemokine (C-C motif) receptor 5                                  | AM4-7 CD195 Cmkb5                                                  | protein-coding       | 5.62  | 5.57  | 7.25   | 7.37   | 0.0014              | 5.595   | 7.31     | 1.715           | 3.28        |
| 10598013    | GeneSymbol            | Ccr5           | chemokine (C-C motif) receptor 5                                  | AM4-7 CD195 Cmkb5                                                  | protein-coding       | 5.62  | 5.57  | 7.25   | 7.37   | 0.0014              | 5.595   | 7.31     | 1.715           | 3.28        |
| 10351509    | GeneSymbol            | Fcgr4          | Fc receptor, Igs, low affinity IV                                 | 4833442P21Rik CD16-2 FcgRIV FcgammaRIV Fcgr3a FcrI3                | protein-coding       | 5.25  | 5.34  | 7.01   | 6.81   | 0.0046              | 5.295   | 6.91     | 1.615           | 3.06        |
| 10559486    | GeneSymbol            | Lair1          | leukocyte-associated Ig-like receptor 1                           | 5133400011Rik BB115266 D7Bwg0421e Lair-1 mLair-1                   | protein-coding       | 6.15  | 5.93  | 7.81   | 7.71   | 0.0049              | 6.04    | 7.76     | 1.72            | 3.29        |
| 10542164    | GeneSymbol            | Clec12a        | C-type lectin domain family 12, member a                          | CLL-1 D230024O04 Micl                                              | protein-coding       | 6.66  | 6.54  | 8.45   | 8.49   | 0.0011              | 6.6     | 8.47     | 1.87            | 3.66        |
| 10354732    | GeneSymbol            | Hspd1          | heat shock protein 1 (chaperonin)                                 | 60kDa Hsp60                                                        | protein-coding       | 7.21  | 6.48  | 8.99   | 8.51   | 0.0488              | 6.845   | 8.75     | 1.905           | 3.75        |
| 10496580    | GeneSymbol            | Gbp3           | guanylate binding protein 3                                       | AW228655 Gbp4                                                      | protein-coding       | 6.34  | 6.22  | 8.28   | 7.73   | 0.0256              | 6.28    | 8.005    | 1.725           | 3.31        |
| 10531994    | GeneSymbol            | Mpa2l          | macrophage activation 2 like                                      | A1595338 GBP6                                                      | protein-coding       | 7.13  | 6.69  | 8.97   | 8.6    | 0.0227              | 6.91    | 8.785    | 1.875           | 3.67        |
| 10416837    | GeneSymbol            | Irg1           | immunoresponsive gene 1                                           | A1323667                                                           | protein-coding       | 6.07  | 6.58  | 8.18   | 7.72   | 0.0419              | 6.325   | 7.95     | 1.625           | 3.08        |
| 10462632    | GeneSymbol            | Kif20b         | kinesin family member 20B                                         | B130024C23 C330014J10Rik Mphosph1                                  | protein-coding       | 5.46  | 5.24  | 6.83   | 6.59   | 0.0140              | 5.35    | 6.71     | 1.36            | 2.57        |
| 10375515    | GeneSymbol            | Ifih4          | interferon gamma inducible protein 47                             | 47kDa IRG-47 Irgd Ilgp4 Ilgp4 Irgd Ohr56                           | protein-coding       | 5.46  | 5.26  | 6.76   | 6.59   | 0.0098              | 5.36    | 6.675    | 1.315           | 2.49        |
| 10534115    | GeneSymbol            | Cxcl10         | chemokine (C-X-C motif) ligand 10                                 | C7 CRG-2 NP10 IP-10 IP10 Ifi10 Scyb10 Igp10 mob-1                  | protein-coding       | 6.87  | 7.02  | 8.23   | 8.91   | 0.0430              | 6.945   | 8.57     | 1.625           | 3.08        |
| 10608846    | Transcribed Locus     | NA             | NA                                                                | NA                                                                 | Unknown              | 6.2   | 6.33  | 7.99   | 7.44   | 0.0359              | 6.265   | 7.715    | 1.45            | 2.73        |
| 10376326    | GeneSymbol            | Irgm2          | immunology-related GTPase family M member 2                       | AAH81100 GTPI Ilgp2 MGC102455                                      | protein-coding       | 6.8   | 6.78  | 8.44   | 8.23   | 0.0046              | 6.79    | 8.335    | 1.545           | 2.92        |
| 10538590    | GeneSymbol            | Herc5          | hect domain and RLD 5                                             | 1700121D12Rik Z510038N07Rik 4930427L17Rik AA1455296 Herc6 KIAA0032 | protein-coding       | 5.92  | 5.63  | 7.25   | 6.92   | 0.0270              | 5.775   | 7.085    | 1.31            | 2.48        |
| 10496569    | GeneSymbol            | Gbp6           | guanylate binding protein 6                                       | 983014724Rik Ghp7                                                  | protein-coding       | 7.1   | 6.81  | 8.44   | 8.21   | 0.0178              | 6.955   | 8.325    | 1.37            | 2.58        |
| 10406928    | GeneSymbol            | Cd180          | CD180 antigen                                                     | F630107B15 Ly78 RP105                                              | protein-coding       | 7.61  | 7.45  | 9      | 9.02   | 0.0030              | 7.53    | 9.01     | 1.48            | 2.79        |
| 10566583    | GeneSymbol            | Gm8995         | predicted gene 8995                                               | AG30026L20 EG668139                                                | unknown              | 7.39  | 7.15  | 8.78   | 8.59   | 0.0115              | 7.27    | 8.685    | 1.415           | 2.67        |
| 10461721    | GeneSymbol            | Mpeg1          | macrophage expressed gene 1                                       | MGC150002 MGC150003 MPS1 Mpg-1                                     | protein-coding       | 7.09  | 7.13  | 8.36   | 8.62   | 0.0090              | 7.11    | 8.49     | 1.38            | 2.60        |
| 10590631    | GeneSymbol            | Ccr2           | chemokine (C-C motif) receptor 2                                  | Cc-ckr-2 Ccr2a Ccr2b Ccr2 Ccr2a Ccr2b Cmkb2r2 mje-r                | protein-coding       | 6.2   | 6.01  | 7.25   | 7.31   | 0.0071              | 6.105   | 7.28     | 1.175           | 2.26        |
| 10385500    | GeneSymbol            | Irgm1          | immunology-related GTPase family M member 1                       | Ifi1 Ilgp3 Ilgp3 Irgm LRG-47                                       | protein-coding       | 7.14  | 6.64  | 8.36   | 8.07   | 0.0444              | 6.89    | 8.215    | 1.325           | 2.51        |
| 10566358    | GeneSymbol            | Trim30         | tripartite motif-containing 30                                    | Rpt-1 Rpt1                                                         | protein-coding       | 6.87  | 6.73  | 8.02   | 8.15   | 0.0055              | 6.8     | 8.085    | 1.285           | 2.44        |
| 10531972    | GeneAccession         | Gbp8           | guanylate-binding protein 8                                       | 5830443L24Rik mGBP8                                                | protein-coding       | 5.93  | 6.02  | 7.19   | 6.99   | 0.0095              | 5.975   | 7.09     | 1.115           | 2.17        |
| 10360173    | GeneSymbol            | Slamf7         | SLAM family member 7                                              | 19A 19A24 4930560D03Rik CRACC CS1                                  | protein-coding       | 6.45  | 6.57  | 7.89   | 7.55   | 0.0215              | 6.51    | 7.72     | 1.21            | 2.31        |
| 10566585    | GeneSymbol            | Gm1966         | predicted gene 1966                                               | -                                                                  | protein-coding       | 6.64  | 6.45  | 7.51   | 7.99   | 0.0429              | 6.545   | 7.75     | 1.205           | 2.31        |
| 10466190    | GeneSymbol            | MS4L14         | membrane-spanning 4-domains, subfamily A, member 14               | Gm1276                                                             | protein-coding       | 5.9   | 5.58  | 6.65   | 6.93   | 0.0386              | 5.74    | 6.79     | 1.05            | 2.07        |
| 10533715    | Transcribed Locus     | NA             | NA                                                                | NA                                                                 | Unknown              | 6.37  | 6.05  | 7.49   | 7.2    | 0.0343              | 6.21    | 7.345    | 1.135           | 2.20        |
| 10358408    | GeneSymbol            | Rgs1           | regulator of G-protein signaling 1                                | BL34                                                               | protein-coding       | 5.83  | 5.51  | 6.7    | 6.69   | 0.0235              | 5.67    | 6.695    | 1.025           | 2.03        |
| 10531980    | GeneAccession         | Gbp9           | guanylate-binding protein 9                                       | E430029F06                                                         | protein-coding       | 6.36  | 6.32  | 7.67   | 7.23   | 0.0374              | 6.34    | 7.45     | 1.11            | 2.16        |
| 10350392    | GeneSymbol            | Aspm           | asp (abnormal spindle)-like, microcephaly associated (Drosophila) | Calmbp1 D330028K02Rik FLI10518 MCPH5 Sha1                          | protein-coding       | 6.59  | 6.63  | 8      | 7.52   | 0.0412              | 6.61    | 7.76     | 1.15            | 2.22        |
| 10376324    | GeneSymbol            | Gm12250        | predicted gene 12250                                              | Irgb10 OTTMUSG00000005723                                          | protein-coding       | 5.81  | 6.02  | 6.95   | 6.93   | 0.0104              | 5.915   | 6.94     | 1.025           | 2.03        |
| 10404606    | GeneSymbol            | Ly86           | lymphocyte antigen 86                                             | MD-1 MD1                                                           | protein-coding       | 8.54  | 8.1   | 9.68   | 9.81   | 0.0249              | 8.32    | 9.745    | 1.425           | 2.69        |
| 10519713    | GeneSymbol            | LOC635773      | hypothetical protein LOC635773                                    | -                                                                  | pseudo               | 5.51  | 5.67  | 6.65   | 6.43   | 0.0199              | 5.59    | 6.54     | 0.95            | 1.93        |
| 10566574    | GeneSymbol            | Gvin1          | GTPase, very large interferon inducible 1                         | 9130002C22Rik 9830104F22Rik Ilgp1 VLIG VLIG-1                      | protein-coding       | 6.86  | 7.04  | 8.28   | 7.97   | 0.0225              | 6.95    | 8.125    | 1.175           | 2.26        |
| 10571984    | GeneSymbol            | Ddx60          | DEAD (Asp-Glu-Ala-Asp) box polypeptide 60                         | 9830118M07 MGC19297                                                | protein-coding       | 5.94  | 5.56  | 6.67   | 6.77   | 0.0387              | 5.75    | 6.72     | 0.97            | 1.96        |
| 10422760    | GeneSymbol            | Fyb            | FYN binding protein                                               | ADAP B630013F22Rik                                                 | protein-coding       | 6.58  | 6.36  | 7.54   | 7.55   | 0.0103              | 6.47    | 7.545    | 1.075           | 2.11        |
| 10462623    | GeneSymbol            | Ifih1          | interferon-induced protein with tetratricopeptide repeats 1       | ISG56 Ifih56                                                       | protein-coding       | 6.34  | 6.33  | 7.3    | 7.46   | 0.0058              | 6.335   | 7.38     | 1.045           | 2.06        |
| 10383192    | Transcribed Locus     | NA             | NA                                                                | NA                                                                 | Unknown              | 6.67  | 6.31  | 7.67   | 7.44   | 0.0380              | 6.49    | 7.555    | 1.065           | 2.09        |
| 10356262    | GeneSymbol            | Gm7609         | predicted pseudogene 7609                                         | EG665378                                                           | protein-coding       | 6.93  | 7.11  | 7.99   | 8.3    | 0.0245              | 7.02    | 8.145    | 1.125           | 2.18        |
| 10601385    | GeneSymbol            | Tlr13          | tolll-like receptor 13                                            | A1666735 gm713                                                     | protein-coding       | 7.01  | 6.76  | 7.81   | 8.16   | 0.0362              | 6.885   | 7.985    | 1.1             | 2.14        |
| 10574104    | GeneSymbol            | NlrC5          | NLR family, CARD domain containing 5                              | AK220210 NOD27                                                     | protein-coding       | 7.13  | 6.91  | 8.28   | 8      | 0.0244              | 7.02    | 8.14     | 1.12            | 2.17        |
| 10502791    | GeneSymbol            | Ifi44          | interferon-induced protein 44                                     | AA30056A10Rik AW261460 MTAP44 p44                                  | protein-coding       | 5.46  | 5.72  | 6.46   | 6.47   | 0.0214              | 5.59    | 6.465    | 0.875           | 1.83        |
| 10527918    | GeneSymbol            | Mterf          | mitochondrial transcription termination factor                    | 4931431L11Rik 9230106K09Rik                                        | protein-coding       | 6.4   | 6.14  | 7.38   | 7.12   | 0.0334              | 6.27    | 7.25     | 0.98            | 1.97        |
| 10541564    | GeneSymbol            | Clec4a3        | C-type lectin domain family 4, member a3                          | 311003711Rik Dc1r3 mdc1r3                                          | protein-coding       | 6.78  | 6.37  | 7.58   | 7.62   | 0.0381              | 6.575   | 7.6      | 1.025           | 2.03        |
| 10462390    | GeneSymbol            | Cd274          | CD274 antigen                                                     | AS30045L16Rik B7h1 Pdcd11 Pdcd1lg1 Pd1                             | protein-coding       | 6.78  | 6.83  | 8.05   | 7.67   | 0.0314              | 6.805   | 7.86     | 1.055           | 2.08        |
| 10574139    | GeneSymbol            | NlrC5          | NLR family, CARD domain containing 5                              | AK220210 NOD27                                                     | protein-coding       | 6.42  | 6.38  | 7.27   | 7.48   | 0.0118              | 6.4     | 7.375    | 0.975           | 1.97        |
| 10403871    | GeneSymbol            | Aoah           | acycloxycyl hydrolase                                             | 4930433E13Rik MGC107583                                            | protein-coding       | 6.37  | 6.19  | 7.15   | 7.31   | 0.0157              | 6.28    | 7.23     | 0.95            | 1.93        |
| 10574137    | GeneSymbol            | NlrC5          | NLR family, CARD domain containing 5                              | AK220210 NOD27                                                     | protein-coding       | 6.95  | 7.22  | 8.25   | 8.04   | 0.0251              | 7.085   | 8.145    | 1.06            | 2.08        |
| 10581813    | GeneSymbol            | Miki           | mixed lineage kinase domain-like                                  | 9130019I51Rik                                                      | protein-coding       | 6.05  | 5.93  | 6.97   | 6.79   | 0.0145              | 5.99    | 6.88     | 0.89            | 1.85        |
| 10521667    | GeneSymbol            | Bst1           | bone marrow stromal cell antigen 1                                | 114 A10 AS30073F09 BP-3 Bp3 Bsta1 CD157 Ly65                       | protein-coding       | 6.75  | 6.35  | 7.6    | 7.44   | 0.0459              | 6.55    | 7.52     | 0.97            | 1.96        |
| 10574098    | GeneSymbol            | NlrC5          | NLR family, CARD domain containing 5                              | AK220210 NOD27                                                     | protein-coding       | 7.52  | 7.52  | 8.58   | 8.65   | 0.0010              | 7.52    | 8.615    | 1.095           | 2.14        |
| 10344801    | GeneSymbol            | Cspp1          | centrosome and spindle pole associated protein 1                  | 2310020J12Rik 4930413Q22Rik AA387550 BC055915 Cssp2 Cssp3          | protein-coding       | 7.1   | 6.7   | 7.86   | 7.92   | 0.0393              | 6.9     | 7.89     | 0.99            | 1.99        |
| 10519951    | GeneSymbol            | Pion           | pigeon homoloe (Drosophila)                                       | AS3008807Rik                                                       | protein-coding       | 6.19  | 5.92  | 6.9    | 6.94   | 0.0240              | 6.055   | 6.92     | 0.865           | 1.82        |
| 10459427    | GeneSymbol            | Catp5          | catepsin 5                                                        | -                                                                  | protein-coding       | 8.01  | 8.84  | 10.23  | 9.96   | 0.0113              | 8.835   | 10.095   | 1.26            | 2.39        |
| 10603551    | GeneSymbol            | Cybb           | cytochrome b-245, beta polypeptide                                | C88302 Cgd Cyd Nox2 Igp91 phox                                     | protein-coding       | 8.98  | 8.77  | 9.93   | 10.34  | 0.0318              | 8.875   | 10.135   | 1.26            | 2.39        |
| 10574151    | GeneSymbol            | NlrC5          | NLR family, CARD domain containing 5                              | AK220210 NOD27                                                     | protein-coding       | 6.23  | 6.45  | 7.35   | 7.11   | 0.0319              | 6.34    | 7.23     | 0.89            | 1.85        |
| 10462618    | GeneSymbol            | Ifih3          | interferon-induced protein with tetratricopeptide repeats 3       | Ifih49 MGC107331                                                   | protein-coding       | 7.29  | 7.2   | 8.25   | 8.27   | 0.0021              | 7.245   | 8.26     | 1.015           | 2.02        |
| 10500335    | GeneSymbol            | Fcgr1          | Fc receptor, Igs, high affinity I                                 | A1323638 AV092959 CD64 FcgammaRI IGGHAFc                           | protein-coding       | 6.59  | 6.49  | 7.4    | 7.5    | 0.0060              | 6.54    | 7.45     | 0.91            | 1.88        |
| 10382106    | GeneSymbol            | Gm885          | predicted gene 885                                                | Allergen-1 MGC179156 Mca32                                         | protein-coding       | 6.37  | 6.29  | 7.22   | 7.2    | 0.0022              | 6.33    | 7.21     | 0.88            | 1.84        |
| 10474825    | GeneSymbol            | D2ertd750e     | DNA segment, Chr 2, ERATO Doi 750, expressed                      | 1700025D04Rik C15orf23 Trafa4f1                                    | protein-coding       | 7.32  | 7.17  | 8.39   | 8.11   | 0.0241              | 7.245   | 8.25     | 1.005           | 2.01        |
| 10379511    | GeneSymbol            | Ccl2           | chemokine (C-C motif) ligand 2                                    | A1323594 HC11 JE MCAF MCP-1 MCP1 SMC-CF Scya2 Sigle                | protein-coding       | 7.13  | 7.13  | 7.94   | 8.27   | 0.0275              | 7.13    | 8.105    | 0.975           | 1.97        |
| 10490150    | GeneSymbol            | Zbp1           | Z-DNA binding protein 1                                           | 201001H03Rik Dai Dim1 mZaDLM                                       | protein-coding       | 6.76  | 7     | 7.79   | 7.85   | 0.0169              | 6.88    | 7.82     | 0.94            | 1.92        |
| 10475517    | GeneSymbol            | AA467197       | expressed sequence AA467197                                       | MGC58382 Nmcs1                                                     | protein-coding       | 5.77  | 5.97  | 6.66   | 6.68   | 0.0154              | 5.87    | 6.67     | 0.8             | 1.74        |
| 10439249    | GeneSymbol            | Parp14         | poly (ADP-ribose) polymerase family, member 14                    | 1600029O10Rik BC021340 CoaSt6 KIAA1268 MGC29390 mKIAA1268          | protein-coding       | 7.12  | 6.8   | 8      | 7.81   | 0.0367              | 6.96    | 7.905    | 0.945           | 1.93        |
| 10384458    | GeneSymbol            | Plek           | pleckstrin                                                        | 2010300B13Rik                                                      | protein-coding       | 7.48  | 7.24  | 8.45   | 8.26   | 0.0229              | 7.36    | 8.355    | 0.995           | 1.99        |
| 10483110    | GeneSymbol            | Ifih1          | interferon induced with helicase C domain 1                       | 9130009C22Rik Helicard Hlcl MDA5 MGC90959                          | protein-coding       | 6.98  | 6.77  | 7.91   | 7.69   | 0.0260              | 6.875   | 7.8      | 0.925           | 1.90        |
| 10379535    | GeneSymbol            | Cc18           | chemokine (C-C motif) ligand 8                                    | 1810063B20Rik AB023418 HC141 MCP-2 Mcp2 Scya8                      | protein-coding       | 6.98  | 6.78  | 7.88   | 7.71   | 0.0200              | 6.88    | 7.795    | 0.915           | 1.89        |
| 10451640    | GeneSymbol            | Mme16ad        | membrane-spanning 4-domains, subfamily A, member 6D               | 1110058E16Rik AA47446 MMe411                                       | protein-coding       |       |       |        |        |                     |         |          |                 |             |

|          |                   |                |                                                                                          |                                                                                         |                |       |       |       |       |        |        |        |       |      |
|----------|-------------------|----------------|------------------------------------------------------------------------------------------|-----------------------------------------------------------------------------------------|----------------|-------|-------|-------|-------|--------|--------|--------|-------|------|
| 10372410 | GeneSymbol        | Glpr1          | GLI pathogenesis-related 1 (glioma)                                                      | 2410114014Rik RTVP-1 RTVP1 mRTVP-1                                                      | protein-coding | 6.59  | 6.38  | 7.28  | 7.27  | 0.0172 | 6.485  | 7.275  | 0.79  | 1.73 |
| 10547274 | GeneSymbol        | Zfp248         | zinc finger protein 248                                                                  | 2810037F07Rik E130106N01Rik MGC100019                                                   | protein-coding | 6.22  | 6.13  | 7.06  | 6.74  | 0.0487 | 6.175  | 6.9    | 0.725 | 1.65 |
| 10435457 | GeneSymbol        | Parp9          | poly (ADP-ribose) polymerase family, member 9                                            | AW214463 RC003281 Bag1 Bal MGC7868                                                      | protein-coding | 7.56  | 7.2   | 8.31  | 8.18  | 0.0456 | 7.38   | 8.245  | 0.865 | 1.82 |
| 10538832 | GeneSymbol        | Mad21          | MAO2 mitotic arrest deficient-like 1 (yeast)                                             | AA673185 MAO2 MGC113763                                                                 | protein-coding | 7.72  | 7.39  | 8.55  | 8.33  | 0.0467 | 7.555  | 8.44   | 0.885 | 1.85 |
| 10503170 | GeneSymbol        | Chd7           | chromodomain helicase DNA binding protein 7                                              | A730019J05Rik Cycn Cyn Ddy Efo Lda Mb Oht Tdo WBE1 Whi                                  | protein-coding | 9     | 8.94  | 10.21 | 9.83  | 0.0320 | 8.97   | 10.02  | 1.05  | 2.07 |
| 10346191 | GeneSymbol        | Stat1          | signal transducer and activator of transcription 1                                       | 2100005J02Rik AA408197                                                                  | protein-coding | 7.85  | 7.69  | 8.81  | 8.54  | 0.0288 | 7.77   | 8.675  | 0.905 | 1.87 |
| 10423941 | GeneSymbol        | Tlc35          | tetratricopeptide repeat domain 35                                                       | 4921531614Rik AV060620 AW209495                                                         | protein-coding | 10.29 | 9.89  | 11.41 | 11.11 | 0.0435 | 10.09  | 11.26  | 1.17  | 2.25 |
| 10530145 | GeneSymbol        | Tlr1           | toll-like receptor 1                                                                     | -                                                                                       | protein-coding | 5.74  | 5.79  | 6.37  | 6.47  | 0.0072 | 5.765  | 6.42   | 0.655 | 1.57 |
| 10385526 | GeneAccession     | 9930111J21Rik2 | RIKEN cDNA 9930111J21 gene 2                                                             | 9930111J21Rik Irgb5 OTTMSG0000005540 RP23-54N20.1                                       | protein-coding | 7.15  | 7.03  | 7.8   | 7.98  | 0.0178 | 7.09   | 7.89   | 0.8   | 1.74 |
| 10574163 | GeneSymbol        | Nlr-c5         | NLR family, CARD domain containing 5                                                     | AK220210 NOD27                                                                          | protein-coding | 6.38  | 6.47  | 7.24  | 7.05  | 0.0207 | 6.425  | 7.145  | 0.72  | 1.65 |
| 10351792 | GeneSymbol        | Slamf9         | SLAM family member 9                                                                     | 231002604Rik A1462096 CD2F-10 CD84-H1 Cd2F10 SF2001                                     | protein-coding | 7.19  | 7.01  | 7.88  | 7.89  | 0.0129 | 7.1    | 7.885  | 0.785 | 1.72 |
| 10531579 | GeneSymbol        | Hmgb1          | high mobility group box 1                                                                | DEF HMG-1 Hmg1 MGC103168 MGC103169 MGC117896 MGC117897 SBP-1 amphoterin p30             | protein-coding | 9.86  | 9.54  | 10.92 | 10.61 | 0.0411 | 9.7    | 10.765 | 1.065 | 2.09 |
| 10607868 | GeneSymbol        | Tlr8           | toll-like receptor 8                                                                     | -                                                                                       | protein-coding | 6.6   | 6.4   | 7.25  | 7.17  | 0.0222 | 6.5    | 7.21   | 0.71  | 1.64 |
| 10385513 | GeneAccession     | 9930111J21Rik2 | RIKEN cDNA 9930111J21 gene 2                                                             | 9930111J21Rik Irgb5 OTTMSG0000005540 RP23-54N20.1                                       | protein-coding | 7.2   | 7.04  | 7.75  | 8.03  | 0.0412 | 7.12   | 7.89   | 0.77  | 1.71 |
| 10504470 | GeneSymbol        | Melk           | maternal embryonic leucine zipper kinase                                                 | A1327312 MFKP38 mKIAA0175                                                               | protein-coding | 6.76  | 6.65  | 7.44  | 7.41  | 0.0062 | 6.705  | 7.425  | 0.72  | 1.65 |
| 10541555 | GeneSymbol        | Clec4a1        | C-type lectin domain family 4, member a1                                                 | BC049354 Dcir4 MGC56880 mDcir4                                                          | protein-coding | 7.23  | 6.93  | 7.8   | 7.87  | 0.0392 | 7.08   | 7.835  | 0.755 | 1.69 |
| 10458782 | GeneSymbol        | Pggt1b         | protein geranyltransferase type I, beta subunit                                          | 2010207C17Rik 2610100E13 A1451237 A1551093 BGG1 GGT1                                    | protein-coding | 6.94  | 7.06  | 7.69  | 7.8   | 0.0117 | 7      | 7.745  | 0.745 | 1.68 |
| 10420426 | GeneSymbol        | F630043A04Rik  | RIKEN cDNA F630043A04 gene                                                               | Ka3                                                                                     | protein-coding | 6.47  | 6.36  | 7.24  | 6.95  | 0.0483 | 6.415  | 7.095  | 0.68  | 1.60 |
| 10606376 | GeneSymbol        | 2610002M06Rik  | RIKEN cDNA 2610002M06 gene                                                               | 8430408J07Rik A1876413 Chmp1b2                                                          | protein-coding | 6.43  | 6.19  | 7.07  | 6.88  | 0.0491 | 6.31   | 6.975  | 0.665 | 1.59 |
| 10473125 | GeneSymbol        | Irga4          | interferon alpha 4                                                                       | CD49D                                                                                   | protein-coding | 7.46  | 7.45  | 8.15  | 8.33  | 0.0129 | 7.455  | 8.24   | 0.785 | 1.72 |
| 10458938 | GeneSymbol        | Gm5594         | predicted gene 8594                                                                      | E6667360                                                                                | pseudo         | 6.76  | 6.6   | 7.31  | 7.45  | 0.0223 | 6.68   | 7.38   | 0.7   | 1.62 |
| 10591881 | GeneSymbol        | Hmgb1          | high mobility group box 1                                                                | DEF HMG-1 Hmg1 MGC103168 MGC103169 MGC117896 MGC117897 SBP-1 amphoterin p30             | protein-coding | 10.17 | 9.99  | 11.26 | 10.98 | 0.0277 | 10.08  | 11.135 | 1.055 | 2.08 |
| 10383212 | Transcribed Locus | NA             | NA                                                                                       | NA                                                                                      | Unknown        | 7.75  | 7.6   | 8.41  | 8.51  | 0.0129 | 7.675  | 8.46   | 0.785 | 1.72 |
| 10383214 | GeneSymbol        | Rnf213         | ring finger protein 213                                                                  | 6030403J01 D11Erd759e KIAA1554 mKIAA1554                                                | protein-coding | 7.52  | 7.36  | 8.09  | 8.31  | 0.0306 | 7.44   | 8.2    | 0.76  | 1.69 |
| 10344895 | GeneSymbol        | Gm7560         | predicted gene 7560                                                                      | E6665262                                                                                | pseudo         | 6.41  | 6.15  | 6.9   | 6.94  | 0.0397 | 6.28   | 6.92   | 0.64  | 1.56 |
| 10512067 | GeneSymbol        | Ddx58          | DEAD (Asp-Glu-Ala-Asp) box polypeptide 58                                                | 6430573D20Rik C330021E21 RIG-I                                                          | protein-coding | 7.75  | 7.51  | 8.39  | 8.39  | 0.0240 | 7.63   | 8.39   | 0.76  | 1.69 |
| 10368222 | GeneSymbol        | 4930444G20Rik  | RIKEN cDNA 4930444G20 gene                                                               | -                                                                                       | protein-coding | 6.43  | 6.34  | 6.97  | 7.06  | 0.0101 | 6.385  | 7.015  | 0.63  | 1.55 |
| 10389627 | GeneSymbol        | Rad51c         | RAD51 homolog c (S. cerevisiae)                                                          | Rad51I2                                                                                 | protein-coding | 6.19  | 6.08  | 6.86  | 6.62  | 0.0445 | 6.135  | 6.74   | 0.605 | 1.52 |
| 10374842 | GeneSymbol        | Cdc88a         | coiled coil domain containing 88A                                                        | A430106J12Rik A1848406 Ape C130096N06Rik C330012F17Rik D130005J21Rik Girdin Giv Hkrl1   | protein-coding | 6.38  | 6.18  | 6.91  | 6.88  | 0.0260 | 6.28   | 6.895  | 0.615 | 1.53 |
| 10502029 | GeneSymbol        | Larp7          | La ribonucleoprotein domain family, member 7                                             | C330027G06Rik D3Wsu161e                                                                 | protein-coding | 7.88  | 7.69  | 8.64  | 8.45  | 0.0299 | 7.785  | 8.545  | 0.76  | 1.69 |
| 10439268 | GeneSymbol        | Dtx3l          | dtxex 3-like (Drosophila)                                                                | AU042200 BC023741 MGC1033262                                                            | protein-coding | 7.35  | 7.1   | 7.9   | 7.96  | 0.0317 | 7.225  | 7.93   | 0.705 | 1.63 |
| 10594774 | GeneSymbol        | Ccnb2          | cyclin B2                                                                                | Cyc2B                                                                                   | protein-coding | 8.99  | 8.86  | 9.87  | 9.71  | 0.0139 | 8.925  | 9.79   | 0.865 | 1.82 |
| 10443980 | GeneSymbol        | Myo1f          | myosin IF                                                                                | C330006B10Rik                                                                           | protein-coding | 6.95  | 7.05  | 7.56  | 7.79  | 0.0328 | 7      | 7.675  | 0.675 | 1.60 |
| 10397543 | GeneAccession     | Gm5662         | predicted gene 5662                                                                      | E6435337                                                                                | protein-coding | 7.6   | 7.28  | 8.16  | 8.15  | 0.0466 | 7.44   | 8.155  | 0.715 | 1.64 |
| 10404221 | GeneSymbol        | Wdr67          | WD repeat domain 67                                                                      | 4831 D330013L20Rik Gm85 MGC76603                                                        | protein-coding | 7.36  | 7.21  | 7.97  | 8.7   | 0.0167 | 7.285  | 7.985  | 0.71  | 1.62 |
| 10401829 | GeneAccession     | Gm5662         | predicted gene 5662                                                                      | E6435337                                                                                | protein-coding | 7.38  | 7.1   | 7.93  | 7.94  | 0.0383 | 7.24   | 7.935  | 0.695 | 1.62 |
| 10487208 | GeneSymbol        | Atp8b4         | ATPase, class I, type 8B, member 4                                                       | AS30043E15 Im MGC1161341                                                                | protein-coding | 5.91  | 6.11  | 6.5   | 6.67  | 0.0484 | 6.01   | 6.585  | 0.575 | 1.49 |
| 10547088 | GeneSymbol        | Mbd4           | methyl-CpG binding domain protein 4                                                      | Med1                                                                                    | protein-coding | 6.33  | 6.53  | 7.1   | 6.99  | 0.0328 | 6.43   | 7.045  | 0.615 | 1.53 |
| 10574143 | GeneSymbol        | Nlr-c5         | NLR family, CARD domain containing 5                                                     | AK220210 NOD27                                                                          | protein-coding | 6.08  | 6.14  | 6.68  | 6.7   | 0.0030 | 6.11   | 6.69   | 0.58  | 1.49 |
| 10492888 | Transcribed Locus | NA             | NA                                                                                       | NA                                                                                      | Unknown        | 7.64  | 7.43  | 8.34  | 8.16  | 0.0354 | 7.535  | 8.25   | 0.715 | 1.64 |
| 10376060 | GeneSymbol        | Irf1           | interferon regulatory factor 1                                                           | AU020929 Irf-1                                                                          | protein-coding | 6.85  | 6.8   | 7.47  | 7.47  | 0.0015 | 6.825  | 7.47   | 0.645 | 1.56 |
| 10503107 | GeneSymbol        | 6330407A03Rik  | RIKEN cDNA 6330407A03 gene                                                               | -                                                                                       | miscRNA        | 5.98  | 6.12  | 6.58  | 6.65  | 0.0187 | 6.05   | 6.615  | 0.565 | 1.48 |
| 10392808 | GeneSymbol        | Cd300103       | CD300 molecule-like family member d                                                      | 4732429D16Rik CLM5 MIRA MAIR-IV clm-5                                                   | protein-coding | 6.47  | 6.53  | 7.15  | 7.06  | 0.0079 | 6.5    | 7.105  | 0.605 | 1.52 |
| 10535473 | GeneSymbol        | Eif3m          | eukaryotic translation initiation factor 3, subunit M                                    | Gal7 MGC118449 Pcid1                                                                    | protein-coding | 7.87  | 7.93  | 8.75  | 8.5   | 0.0300 | 7.9    | 8.625  | 0.725 | 1.65 |
| 10372648 | GeneSymbol        | Lyz2           | lysozyme 2                                                                               | A1326280 Lys Lys Lzm Lzm-s1 Lzp                                                         | protein-coding | 11.15 | 10.74 | 11.94 | 11.95 | 0.0396 | 10.945 | 11.945 | 1     | 2.00 |
| 10358224 | GeneSymbol        | Ptprc          | protein tyrosine phosphatase, receptor type, C                                           | B220 CD45R Cd45 Ly5-4 Ly4-4 T200 loc                                                    | protein-coding | 7.94  | 7.75  | 8.46  | 8.65  | 0.0340 | 7.845  | 8.555  | 0.71  | 1.64 |
| 10477649 | GeneSymbol        | Acs2           | acyl-CoA synthetase short-chain family member 2                                          | 1110017C11Rik ACAS Acas1 Acas2 AcceCS1 Acs1                                             | protein-coding | 7.84  | 7.58  | 8.45  | 8.35  | 0.0384 | 7.71   | 8.4    | 0.69  | 1.61 |
| 10462613 | GeneSymbol        | Hfi2           | interferon-induced protein with tetratricopeptide repeats 2                              | AV302338 Hfi54                                                                          | protein-coding | 6.49  | 6.26  | 6.91  | 6.98  | 0.0417 | 6.375  | 6.945  | 0.57  | 1.48 |
| 10496771 | GeneSymbol        | Mucin2         | mucinolin 2                                                                              | 3300002C04Rik A1549968 C86638 TRPML2                                                    | protein-coding | 6.23  | 6.39  | 6.77  | 6.96  | 0.0466 | 6.31   | 6.865  | 0.555 | 1.47 |
| 10382104 | Transcribed Locus | NA             | NA                                                                                       | NA                                                                                      | Unknown        | 10.96 | 11.26 | 12.21 | 11.95 | 0.0394 | 11.11  | 12.08  | 0.97  | 1.96 |
| 10363265 | GeneSymbol        | Lims1          | LIM and senescent cell antigen-like domains 1                                            | 2310016J22Rik 4921524A02Rik A1507642 AU021743 AW551584 C430041B13Rik Lims1 PINCH PINCH1 | protein-coding | 8.61  | 8.36  | 9.33  | 9.12  | 0.0454 | 8.485  | 9.225  | 0.74  | 1.67 |
| 10569890 | GeneSymbol        | Aida           | axin interactor, dorsoalization associated                                               | 2610208M17Rik BC000483 MGC101949 MGC6869                                                | protein-coding | 8.84  | 8.53  | 9.49  | 9.39  | 0.0435 | 8.685  | 9.44   | 0.755 | 1.69 |
| 10477250 | GeneSymbol        | Hck            | hemopoietic cell kinase                                                                  | A1849071 Bmk MGC18625                                                                   | protein-coding | 7     | 6.92  | 7.58  | 7.55  | 0.0049 | 6.96   | 7.565  | 0.605 | 1.52 |
| 10475648 | GeneSymbol        | Dtdw1          | DTW domain containing 1                                                                  | 1810033A06Rik                                                                           | protein-coding | 7.43  | 7.29  | 8.04  | 7.95  | 0.0167 | 7.36   | 7.995  | 0.635 | 1.55 |
| 10542738 | GeneSymbol        | Rassf8         | Ras association (RalGDS/AF-6) domain family (N-terminal) member 8                        | 5133400D11Rik AA815821 AW1232440 Hoj1 MGC144731 MGC144732 ImHoj-1                       | protein-coding | 8.16  | 7.87  | 8.69  | 8.72  | 0.0419 | 8.015  | 8.705  | 0.69  | 1.61 |
| 10581434 | GeneSymbol        | Dpep2          | dipeptidase 2                                                                            | F630103D06Rik IMBD-2                                                                    | protein-coding | 7.98  | 7.87  | 8.5   | 8.7   | 0.0274 | 7.925  | 8.6    | 0.675 | 1.60 |
| 10358589 | GeneSymbol        | Hmcn1          | hemicentin 1                                                                             | EG545370 Gm201                                                                          | protein-coding | 7.65  | 7.5   | 8.24  | 8.2   | 0.0142 | 7.575  | 8.22   | 0.645 | 1.56 |
| 10505630 | GeneSymbol        | Snapc3         | small nuclear RNA activating complex, polypeptide 3                                      | 1810020H02Rik 4930558A07Rik 5031401C21Rik A1414457 E030018J20Rik                        | protein-coding | 9.61  | 9.42  | 10.29 | 10.35 | 0.0150 | 9.515  | 10.32  | 0.805 | 1.75 |
| 10344799 | GeneSymbol        | Csppl          | centrosome and spindle pole associated protein 1                                         | 2310020J12Rik 4930413022Rik AA387550 BC055915 Csppl2 Csppl3                             | protein-coding | 7.82  | 7.8   | 8.45  | 8.49  | 0.0011 | 7.81   | 8.47   | 0.66  | 1.58 |
| 10376144 | GeneSymbol        | Fnp1           | follin interacting protein 1                                                             | A730024A03Rik A1838773 AW557298 KIAA1961 MGC100017                                      | protein-coding | 8.39  | 8.2   | 8.91  | 9.07  | 0.0305 | 8.295  | 8.99   | 0.695 | 1.62 |
| 10383233 | GeneSymbol        | Rnf213         | ring finger protein 213                                                                  | 6030403J01 D11Erd759e KIAA1554 mKIAA1554                                                | protein-coding | 8.06  | 7.95  | 8.54  | 8.8   | 0.0422 | 8.005  | 8.67   | 0.665 | 1.59 |
| 10427938 | GeneSymbol        | Fam1105a       | family with sequence similarity 105, member A                                            | 9830126M1 MGC59004                                                                      | protein-coding | 6.76  | 6.54  | 7.2   | 7.2   | 0.0377 | 6.65   | 7.2    | 0.55  | 1.46 |
| 10401841 | GeneSymbol        | Dio2           | diiodinase, iodothyronine, type II                                                       | 5D11 A1242671 DIO1                                                                      | protein-coding | 6.88  | 6.86  | 7.36  | 7.51  | 0.0175 | 6.87   | 7.435  | 0.565 | 1.48 |
| 10445119 | GeneSymbol        | H2-M3          | histocompatibility 2, M region locus 3                                                   | H-2M3 Hmt M3a R482                                                                      | protein-coding | 6.77  | 6.85  | 7.42  | 7.32  | 0.0128 | 6.81   | 7.37   | 0.56  | 1.47 |
| 10502240 | GeneSymbol        | Npnt           | nephrocin                                                                                | 1110090H02Rik AA682063 A1314031 Nctn POEM                                               | protein-coding | 8.09  | 8     | 8.59  | 8.79  | 0.0277 | 8.045  | 8.69   | 0.645 | 1.56 |
| 10413059 | GeneSymbol        | Vcl            | vinculin                                                                                 | 9430097D21 EA571387 A1462105 AW545629                                                   | protein-coding | 8.78  | 8.51  | 9.4   | 9.27  | 0.0441 | 8.645  | 9.335  | 0.69  | 1.61 |
| 10446282 | GeneSymbol        | Emr1           | EGF-like module containing, mucin-like, hormone receptor-like sequence 1                 | DD745-77 EGF-TM7 F4/80 Gpf480 Ly71 TM7L3                                                | protein-coding | 8.16  | 8.02  | 8.68  | 8.78  | 0.0176 | 8.09   | 8.73   | 0.64  | 1.56 |
| 10410560 | GeneSymbol        | Trip13         | thyroid hormone receptor interactor 13                                                   | 2410002G23Rik D13Erd328e                                                                | protein-coding | 6.83  | 6.87  | 7.51  | 7.27  | 0.0042 | 6.85   | 7.39   | 0.54  | 1.45 |
| 10544732 | GeneSymbol        | Skap2          | src family associated phosphoprotein 2                                                   | 2610021A10Rik AA960083 BB137539 RA70 SKAP-HOM Saps Scap2 mSKAP55R                       | protein-coding | 7.29  | 7.18  | 7.8   | 7.81  | 0.0093 | 7.235  | 7.805  | 0.57  | 1.48 |
| 10397085 | GeneSymbol        | Rbm25          | RNA binding motif protein 25                                                             | 2600011C06Rik 2610015J01Rik A130095G20Rik A1159562 AL023075 AU043498 RNPC7              | protein-coding | 9.49  | 9.2   | 10.09 | 10.07 | 0.0370 | 9.345  | 10.08  | 0.735 | 1.66 |
| 10541258 | GeneSymbol        | Psmb8          | proteasome (prosome, macropain) subunit, beta type 8 [large multifunctional peptidase 7] | Lmp-7 Lmp7                                                                              | protein-coding | 6.94  | 7.05  | 7.47  | 7.62  | 0.0274 | 6.995  | 7.545  | 0.55  | 1.46 |
| 10574102 | GeneSymbol        | Nlr-c5         | NLR family, CARD domain containing 5                                                     | AK220210 NOD27                                                                          | protein-coding | 7.84  | 7.7   | 8.47  | 8.29  | 0.0332 | 7.77   | 8.38   | 0.61  | 1.53 |
| 10418004 | GeneSymbol        | Ap3m1          | adaptor-related protein complex 3                                                        |                                                                                         |                |       |       |       |       |        |        |        |       |      |

|          |                   |               |                                                                     |                                                                       |                |       |       |       |       |        |        |        |       |      |
|----------|-------------------|---------------|---------------------------------------------------------------------|-----------------------------------------------------------------------|----------------|-------|-------|-------|-------|--------|--------|--------|-------|------|
| 10584334 | GeneSymbol        | Siae          | sialic acid acetyltransferase                                       | LSE Ysg2                                                              | protein-coding | 7.18  | 7     | 7.61  | 7.64  | 0.0279 | 7.09   | 7.625  | 0.535 | 1.45 |
| 10510254 | GeneSymbol        | Fv1           | Friend virus susceptibility 1                                       | Fv-1 Rv-1 Rv1                                                         | protein-coding | 7.16  | 7.17  | 7.82  | 7.59  | 0.0426 | 7.165  | 7.705  | 0.54  | 1.45 |
| 10446771 | GeneSymbol        | Lclat1        | lysocardiolipin acyltransferase 1                                   | A1181996 Agpat8 Alcat1 Gm91 Lycat                                     | protein-coding | 8.95  | 8.71  | 9.4   | 9.58  | 0.0480 | 8.83   | 9.49   | 0.66  | 1.58 |
| 10421768 | GeneSymbol        | Akap11        | A kinase (PRKA) anchor protein 11                                   | 6330501D17Rik AKAP220 Gm80 PRKA11 mKIAA0629                           | protein-coding | 8.71  | 8.53  | 9.28  | 9.24  | 0.0201 | 8.62   | 9.26   | 0.64  | 1.56 |
| 10543959 | GeneSymbol        | Ptn           | pleiotrophin                                                        | HARP HB-GAM HBBN HBGF-8 HBNF OSF Osf-1 Osf1                           | protein-coding | 7.58  | 7.59  | 8.12  | 8.17  | 0.0021 | 7.585  | 8.145  | 0.56  | 1.47 |
| 10551760 | GeneSymbol        | Zfp84         | zinc finger protein 84                                              | 2210410P13Rik 4633401C23Rik A415447 BB081605 C86188 KRAB18 Zfp69      | protein-coding | 7.77  | 7.87  | 8.47  | 8.32  | 0.0237 | 7.82   | 8.395  | 0.575 | 1.49 |
| 10405731 | GeneSymbol        | 4933434E20Rik | RIKEN cDNA 4933434E20 gene                                          | 5730552722Rik A4462154 NICE-3 NSSA794                                 | protein-coding | 8.58  | 8.58  | 9.34  | 9.08  | 0.0400 | 8.58   | 9.21   | 0.63  | 1.55 |
| 10407766 | GeneSymbol        | Lgals8        | lectin, galactose binding, soluble 8                                | 1200015E08Rik AI326142 D13Ert524e Lgals-8                             | protein-coding | 8.38  | 8.26  | 9.01  | 8.95  | 0.0258 | 8.32   | 8.93   | 0.61  | 1.53 |
| 10371277 | GeneSymbol        | B230315N10Rik | RIKEN cDNA B230315N10 gene                                          | MGC19022                                                              | protein-coding | 8.06  | 7.88  | 8.47  | 8.63  | 0.0405 | 7.97   | 8.55   | 0.58  | 1.49 |
| 10383152 | Transcribed Locus | NA            | NA                                                                  | NA                                                                    | Unknown        | 7.63  | 7.65  | 8.1   | 8.29  | 0.0284 | 7.64   | 8.195  | 0.555 | 1.47 |
| 10462454 | GeneSymbol        | Uhrf2         | ubiquitin-like, containing PHD and RING finger domains 2            | 2310065A22Rik A426270 AW214556 D130071B19Rik Nirf                     | protein-coding | 7.94  | 7.8   | 8.53  | 8.33  | 0.0444 | 7.87   | 8.43   | 0.56  | 1.47 |
| 10445781 | GeneSymbol        | Trem2         | triggering receptor expressed on myeloid cells 2                    | Trem2a Trem2b Trem2c                                                  | protein-coding | 7.58  | 7.75  | 8.12  | 8.3   | 0.0479 | 7.665  | 8.21   | 0.545 | 1.46 |
| 10522596 | GeneSymbol        | Tmem165       | transmembrane protein 165                                           | AV026557 Tparl Tparl pFT27                                            | protein-coding | 9.86  | 9.62  | 10.48 | 10.31 | 0.0469 | 9.74   | 10.395 | 0.655 | 1.57 |
| 10451650 | GeneSymbol        | Nfy           | nuclear transcription factor-Y alpha                                | AA407810 Cbfb SEZ-10 SEZ10                                            | protein-coding | 8.35  | 8.23  | 8.95  | 8.73  | 0.0482 | 8.29   | 8.84   | 0.55  | 1.46 |
| 10485395 | GeneSymbol        | Trim44        | tripartite motif-containing 44                                      | Dipb MGC102054 Mc7                                                    | protein-coding | 8.27  | 8.26  | 8.91  | 8.71  | 0.0321 | 8.265  | 8.81   | 0.545 | 1.46 |
| 10348004 | GeneSymbol        | Psm1          | proteasome (prosome, macropain) 26S subunit, non-ATPase, 1          | 2410026J11Rik P112 S1                                                 | protein-coding | 10.42 | 10.14 | 11    | 10.91 | 0.0443 | 10.28  | 10.955 | 0.675 | 1.60 |
| 10502058 | GeneAccession     | Ap1ar         | adaptor-related protein complex 1 associated regulatory protein     | AA407621 C78909 MGC7434                                               | protein-coding | 9.75  | 9.65  | 10.43 | 10.23 | 0.0301 | 9.7    | 10.33  | 0.63  | 1.55 |
| 10444830 | GeneSymbol        | H2-Q7         | histocompatibility 2, Q region locus 7                              | H-2Q7 Ped Q9 Qa-2 Qa-7 Qa7                                            | protein-coding | 10.56 | 10.46 | 11.14 | 11.23 | 0.0098 | 10.51  | 11.185 | 0.675 | 1.60 |
| 10574436 | GeneSymbol        | Khdrbs1       | KH domain containing, RNA binding, signal transduction associated 1 | Sam68 p62                                                             | protein-coding | 9.14  | 8.93  | 9.58  | 9.64  | 0.0342 | 9.035  | 9.61   | 0.575 | 1.49 |
| 10366004 | GeneSymbol        | Atp2b1        | ATPase, Ca++ transporting, plasma membrane 1                        | 281044212Rik E130111D10Rik Pmca1                                      | protein-coding | 9.82  | 9.62  | 10.31 | 10.34 | 0.0268 | 9.72   | 10.325 | 0.605 | 1.52 |
| 10586168 | GeneSymbol        | Snord16a      | small nuclear RNA, C/D box 16A                                      | MBII-98                                                               | snoRNA         | 9.05  | 8.92  | 9.5   | 9.55  | 0.0162 | 8.985  | 9.525  | 0.54  | 1.45 |
| 10364280 | GeneSymbol        | Pttg1p        | pituitary tumor-transforming 1 interacting protein                  | 1810010L20Rik AI314311 AU018448 C79540 MGC36923                       | protein-coding | 9.57  | 9.42  | 10.07 | 10.05 | 0.0175 | 9.495  | 10.06  | 0.565 | 1.48 |
| 10413695 | GeneSymbol        | Pbrm1         | polybromo 1                                                         | 2610016F04Rik AI507524 BAF180 Pb1                                     | protein-coding | 9.96  | 9.76  | 10.48 | 10.41 | 0.0313 | 9.86   | 10.445 | 0.585 | 1.50 |
| 10493292 | GeneSymbol        | 2810403A07Rik | RIKEN cDNA 2810403A07 gene                                          | A430106P18Rik AI256352 AI451678 Blom7 Kiaa0907                        | protein-coding | 9.35  | 9.11  | 9.78  | 9.76  | 0.0463 | 9.23   | 9.77   | 0.54  | 1.45 |
| 10363703 | GeneSymbol        | Jmjd1c        | jumonji domain containing 1C                                        | 5430433L24Rik D630035I23Rik Jmjd1c TRIP8                              | protein-coding | 9.19  | 8.99  | 9.65  | 9.59  | 0.0367 | 9.09   | 9.62   | 0.53  | 1.44 |
| 10471586 | GeneSymbol        | Hspa5         | heat shock protein 5                                                | AL022860 AU019543 Bip D2Wsu141e D2Wsu17e Grp78 Hsce70 SEZ-7 Sez7 mBIP | protein-coding | 10.36 | 10.23 | 10.94 | 10.84 | 0.0185 | 10.295 | 10.89  | 0.595 | 1.51 |
| 10572747 | GeneSymbol        | Tpm4          | tropomyosin 4                                                       | 2610528G24Rik                                                         | protein-coding | 10.73 | 10.48 | 11.18 | 11.13 | 0.0497 | 10.605 | 11.155 | 0.55  | 1.46 |
| 10517508 | GeneSymbol        | C1qb          | complement component 1, q subcomponent, beta polypeptide            | -                                                                     | protein-coding | 10.44 | 10.37 | 10.84 | 11.04 | 0.0371 | 10.405 | 10.94  | 0.535 | 1.45 |
| 10385599 | GeneSymbol        | Canx          | calnexin                                                            | 1110069N15Rik AI988026 Cnx D11Ert153e                                 | protein-coding | 11.3  | 11.16 | 11.77 | 11.83 | 0.0174 | 11.23  | 11.8   | 0.57  | 1.48 |

**Table S4.** Table showing the full data set for upstream regulators shown in Table 1.

| Upstream Regulator                                 | Molecule Type              | Predicted Activation State | Activation z-score | p-value of overlap | Target molecules in dataset                                                                                                                                                                                                                                                                          |
|----------------------------------------------------|----------------------------|----------------------------|--------------------|--------------------|------------------------------------------------------------------------------------------------------------------------------------------------------------------------------------------------------------------------------------------------------------------------------------------------------|
| <b>Type I IFN responses</b>                        |                            |                            |                    |                    |                                                                                                                                                                                                                                                                                                      |
| Ifnar                                              | group                      | Activated                  | 4.5                | 1.4E-27            | Ccl2,CD274,CD40,CXCL10,CXCL9,DDX58,HLA-B,HLA-G,IFIH1,IFIT1B,IFIT2,IFIT3,IRF1,IRGM,ITGA4,NLRC5,PSMB8,Rnf213,STAT1,USP18,ZBP1                                                                                                                                                                          |
| IFNB1                                              | cytokine                   | Activated                  | 3.8                | 1.4E-23            | Ccl2,CCR5,CD274,CD40,CXCL10,CXCL9,DDX58,GBP4,Gbp6 (includes others),GBP7,Gbp8,Gvin1 (includes others),IFIH1,IFIT1B,IFIT2,IFIT3,IRF1,Irg1,IRGM,STAT1,Tgtp1/Tgtp2,TLR13,Trim30a/Trim30d,USP18,VCL,ZBP1                                                                                                 |
| IRF7                                               | transcription regulator    | Activated                  | 4.3                | 5.9E-20            | CD40,CXCL10,CXCL9,DDX58,FCGR1A,GBP4,IFI44,IFIH1,IFIT1B,IFIT2,IFIT3,IRF1,IRGM,Oasl2,PARP14,PSMB8,STAT1,Trim30a/Trim30d,USP18,ZBP1                                                                                                                                                                     |
| STAT1                                              | transcription regulator    | Activated                  | 4.3                | 2.4E-17            | Ccl2,Ccl8,CD274,CD40,CXCL10,CXCL9,FCGR1A,Gbp6 (includes others),HERC6,IFIT1B,IFIT2,IFIT3,IRF1,Irg1,IRGM,PSMB8,PTN,Rnf213,STAT1,Tgtp1/Tgtp2,USP18                                                                                                                                                     |
| IRF3                                               | transcription regulator    | Activated                  | 3.6                | 7.4E-16            | Ccl2,CXCL10,CXCL9,DDX58,FCGR1A,IFI44,IFIH1,IFIT1B,IFIT2,IFIT3,IRGM,Oasl2,PARP14,STAT1,Trim30a/Trim30d,USP18,ZBP1                                                                                                                                                                                     |
| TLR3                                               | transmembrane receptor     | Activated                  | 3.6                | 2.4E-14            | Ccl2,CD274,CD40,CXCL10,CXCL9,DDX58,GBP4,IFI44,IFIH1,IFIT2,IFIT3,Ilgp1,Irg1,Oasl2,PIK3R3,RGS1,STAT1,USP18                                                                                                                                                                                             |
| Interferon alpha                                   | group                      | Activated                  | 4.4                | 5.1E-14            | CCR5,CD40,CXCL10,CXCL9,DDX58,FCGR1A,HLA-B,HLA-G,IFIH1,IFIT1B,IFIT2,IFIT3,IRF1,ITGA4,PSMB8,STAT1,Tgtp1/Tgtp2,TLR1,USP18,ZBP1                                                                                                                                                                          |
| IFNL1                                              | cytokine                   | Activated                  | 3.4                | 7.5E-14            | CD40,CXCL10,CXCL9,DDX58,DDX60,HERC6,IFI44,IFIH1,IFIT2,IFIT3,STAT1,USP18                                                                                                                                                                                                                              |
| IFNAR1                                             | transmembrane receptor     | Activated                  | 2.8                | 3.6E-13            | CD40,CXCL10,CXCL9,HLA-B,IFI44,IFIH1,IFIT1B,IFIT2,IFIT3,Irg1,Oasl2,STAT1,USP18                                                                                                                                                                                                                        |
| IFN Beta                                           | group                      | Activated                  | 3.4                | 6.5E-13            | CD274,CD40,CXCL10,DDX58,HLA-B,HLA-G,IFIH1,IFIT1B,IFIT2,IRF1,STAT1,USP18,ZBP1                                                                                                                                                                                                                         |
| IFNA2                                              | cytokine                   | Activated                  | 3.7                | 2.0E-12            | CXCL10,CXCL9,DDX58,DDX60,EMR1,HERC6,HLA-B,IFI44,IFIH1,IFIT2,IFIT3,IRF1,PAR9,STAT1,USP18,ZBP1                                                                                                                                                                                                         |
| IFN alpha/beta                                     | group                      | Activated                  | 3.3                | 5.6E-12            | CCR2,CD40,CXCL10,CXCL9,IFIT2,IFIT3,IRF1,IRGM,STAT1,Tgtp1/Tgtp2,TLR1                                                                                                                                                                                                                                  |
| IFNA1/IFNA13                                       | cytokine                   | Activated                  | 2.9                | 8.5E-12            | CD40,CXCL10,CXCL9,IFIH1,IFIT2,IRF1,STAT1,Tgtp1/Tgtp2,USP18,ZBP1                                                                                                                                                                                                                                      |
| TLR4                                               | transmembrane receptor     | Activated                  | 3.3                | 1.3E-11            | Ccl2,CCR5,CD274,CD40,CXCL10,CXCL9,HMGB1,IFIT1B,IFIT2,IFIT3,Ilgp1,IRF1,IRGM,PLEK,RGS1,STAT1,TREM2                                                                                                                                                                                                     |
| IFN type 1                                         | group                      | Activated                  | 2.9                | 2.2E-11            | Ccl2,CXCL10,CXCL9,DDX58,IFIH1,IFIT1B,IFIT2,IRF1,STAT1                                                                                                                                                                                                                                                |
| DDX58 (RIG-I)                                      | enzyme                     | Activated                  | 2.0                | 4.0E-11            | CXCL10,DDX58,IFI44,IFIH1,IFIT1B,IFIT2,IFIT3,IRF1,STAT1                                                                                                                                                                                                                                               |
| IFNE                                               | cytokine                   | Activated                  | 2.4                | 8.3E-11            | CD40,CXCL10,CXCL9,IFIH1,IFIT2,STAT1,USP18,ZBP1                                                                                                                                                                                                                                                       |
| IFNK                                               | cytokine                   | Activated                  | 2.2                | 1.1E-10            | CD40,CXCL10,CXCL9,IFIH1,IRF1,STAT1,ZBP1                                                                                                                                                                                                                                                              |
| IKBKE                                              | kinase                     |                            | 0.1                | 9.7E-10            | Ccl2,CXCL10,HLA-B,IFIH1,IFIT2,IFIT3,Irg1,STAT1                                                                                                                                                                                                                                                       |
| <b>Negative regulators of Type 1 IFN responses</b> |                            |                            |                    |                    |                                                                                                                                                                                                                                                                                                      |
| SOCS1                                              | other                      | Inhibited                  | -3.9               | 4.6E-20            | Ccl2,CD40,CXCL10,CXCL9,DDX58,Gbp6 (includes others),GBP7,Gvin1 (includes others),IFI44,IFIH1,IFIT1B,IFIT2,IFIT3,Ilgp1,IRF1,Irg1,Oasl2,STAT1                                                                                                                                                          |
| TRIM24                                             | transcription regulator    | Inhibited                  | -4.1               | 9.4E-20            | CXCL10,DDX58,DDX60,GBP4,HERC6,IFI44,IFIH1,IFIT1B,IFIT2,IFIT3,Ilgp1,IRF1,IRGM,PSMB8,STAT1,Tgtp1/Tgtp2,USP18                                                                                                                                                                                           |
| mir-21                                             | microRNA                   | Inhibited                  | -3.8               | 1.0E-17            | AOAH,CD180,CD274,CXCL10,CXCL9,FCGR1A,Gbp6 (includes others),GBP7,Gbp8,Gvin1 (includes others),Ilgp1,IRF1,IRGM,NLRC5,STAT1,Tgtp1/Tgtp2,TLR1,TREM2                                                                                                                                                     |
| <b>Cytokines</b>                                   |                            |                            |                    |                    |                                                                                                                                                                                                                                                                                                      |
| IFNG                                               | cytokine                   | Activated                  | 6.3                | 1.1E-21            | BST1,C1QB,Ccl2,Ccl8,CCR2,CCR5,CD274,CD40,CTSS,CXCL10,CXCL9,CYBB,DDX58,DTX3L,FCGR1A,FCGR3A,GBP4,Gbp6 (includes others),GBP7,Gbp8,Gvin1 (includes others),HCK,HERC6,HLA-B,HLA-G,HMGB1,HSPD1,IFI44,IFIH1,IFIT2,IFIT3,Ilgp1,IRF1,Irg1,IRGM,NLRC5,PARP9,PLEK,PSMB8,PTN,STAT1,Tgtp1/Tgtp2,TLR1,TREM2,USP18 |
| IL12 (complex)                                     | complex                    |                            | 1.8                | 5.7E-11            | Ccl2,CCR2,CCR5,CXCL10,CXCL9,EMR1,IFIH1,IFIT1B,IFIT2,Ilgp1,IRF1,ITGA4,Tgtp1/Tgtp2,Trim30a/Trim30d                                                                                                                                                                                                     |
| IL6                                                | cytokine                   | Activated                  | 3.9                | 6.7E-10            | Ccl2,CCNB2,CCR2,CCR5,CD40,CXCL10,CXCL9,CYBB,EMR1,FCGR1A,HLA-B,HSPA5,IFIT1B,IFIT2,IRF1,LY86,Lyz1/Lyz2,MAD2L1,PSMB8,PTPRC,STAT1,TLR1                                                                                                                                                                   |
| <b>T cell responses</b>                            |                            |                            |                    |                    |                                                                                                                                                                                                                                                                                                      |
| DOCK8                                              | other                      | Activated                  | 3.2                | 3.6E-11            | CD40,CXCL10,CXCL9,IFIT1B,IFIT2,IFIT3,Ilgp1,IRF1,RGS1,STAT1                                                                                                                                                                                                                                           |
| TCR                                                | complex                    |                            | 0.5                | 5.3E-11            | CCR2,CCR5,CXCL10,CXCL9,DDX58,GBP4,HSPA5,HSPD1,IFI44,IFIH1,IFIT2,IFIT3,IRF1,PIK3R3,PTPRC,STAT1                                                                                                                                                                                                        |
| <b>Apoptosis</b>                                   |                            |                            |                    |                    |                                                                                                                                                                                                                                                                                                      |
| PARP1                                              | enzyme                     | Activated                  | 3.1                | 1.6E-10            | Ccl2,CD274,CXCL10,CXCL9,GBP4,Gbp6 (includes others),GBP7,Ilgp1,STAT1,Tgtp1/Tgtp2                                                                                                                                                                                                                     |
| <b>M2</b>                                          |                            |                            |                    |                    |                                                                                                                                                                                                                                                                                                      |
| STAT3                                              | transcription regulator    | Activated                  | 2.3                | 2.5E-10            | Ccl8,CCR5,CD274,CD40,CXCL10,CXCL9,FCGR1A,GLIPR1,HLA-B,IFI44,IFIH1,IFIT1B,IFIT3,IRF1,Lyz1/Lyz2,PSMB8,PTN,STAT1                                                                                                                                                                                        |
| <b>Autophagy</b>                                   |                            |                            |                    |                    |                                                                                                                                                                                                                                                                                                      |
| IRGM                                               | other                      | Inhibited                  | -2.8               | 3.8E-10            | CCNB2,CXCL10,CXCL9,IFIT1B,IFIT2,IFIT3,Ilgp1,USP18                                                                                                                                                                                                                                                    |
| <b>Other</b>                                       |                            |                            |                    |                    |                                                                                                                                                                                                                                                                                                      |
| PLK4                                               | kinase                     | Activated                  | 2.6                | 2.2E-10            | CD40,CXCL10,CXCL9,IFIT2,Ilgp1,IRF1,RGS1                                                                                                                                                                                                                                                              |
| PLK2                                               | kinase                     | Activated                  | 2.6                | 3.0E-10            | CD40,CXCL10,CXCL9,IFIT2,Ilgp1,IRF1,RGS1                                                                                                                                                                                                                                                              |
| FZD9                                               | G-protein coupled receptor | Activated                  | 2.4                | 9.2E-10            | Ccl2,CXCL10,IFI44,IFIT1B,Oasl2,STAT1                                                                                                                                                                                                                                                                 |

**Table S5.** Attempts to isolate replication competent virus from foot tissues of CHIKV infected C57BL/6 mice  $\geq 30$  days post infection. \* positive when day 14 feet were used.

| <b>Isolation method</b>                                | <b>Amplification method</b>          | <b>Detection assay</b>      | <b>Outcome</b> |
|--------------------------------------------------------|--------------------------------------|-----------------------------|----------------|
| Macerated foot tissue                                  | C6/36                                | Vero CPE                    | Negative       |
| Cells from collagenase digested macerated foot tissues | C6/36                                | Vero CPE                    | Negative*      |
| Macerated and freeze thawed foot tissue                | C6/36                                | Vero CPE                    | Negative       |
| Supernatant from homogenised foot tissue               | i.p. into IRF3/7 <sup>-/-</sup> mice | Disease (Rudd et al., 2012) | Negative       |
| Cells from macerated foot tissue                       | i.p. into IRF3/7 <sup>-/-</sup> mice | Disease                     | Negative       |
| Supernatant from homogenised foot tissue               | i.p. into Rag1 <sup>-/-</sup> mice   | Viraemia                    | Negative       |
| Cells from macerated foot tissue                       | i.p. into Rag1 <sup>-/-</sup> mice   | Viraemia                    | Negative       |
| RNA isolated from foot tissues                         | Transfection of BHK cells            | C6/36/Vero CPE              | Negative       |

**Figure S1A.** Foot swelling and/or viraemia in C57BL/6 mice infected with CHIKV isolates recovered from Rag1<sup>-/-</sup> mice days 100 and 429 post infection. (a) Foot swelling in C57BL/6 mice inoculated with parental virus or virus derived from Rag1<sup>-/-</sup> mice 100 days post infection (Rag100). (n=8 feet per group). (b) Viraemia in C57BL/6 mice inoculated with parental virus or virus derived from Rag1<sup>-/-</sup> mice 100 days post infection (Rag100). (n=4 mice per group). (c) Viraemia day 1 and 3 in C57BL/6 mice inoculated with parental virus or virus derived from 3 different Rag1<sup>-/-</sup> mice 429 days post infection (Rag429). (n=4 mice per group).

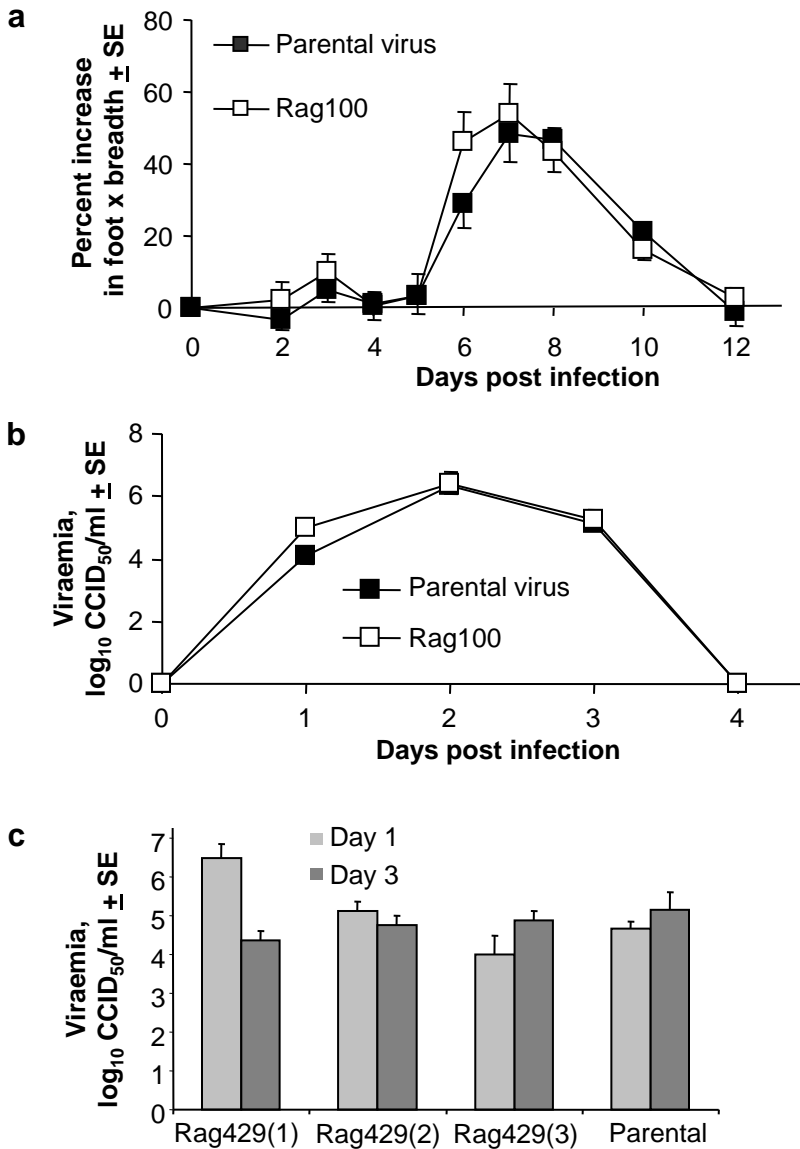



**Figure S1B.** Mutations identified in CHIKV recovered from Rag1<sup>-/-</sup> mice day 100 post infection. Parental Reunion Island isolate LR2006 OPY1 (passaged twice in C6/36 cells) used herein (Gardner et al., 2010) and virus isolated from Rag1<sup>-/-</sup> mice at day 100 post infection (Rag100) were grown in C6/36 cells, partially purified (0.22 μM filtration, DNase/RNase treated, and 100,000 g 1 h centrifugation), RNA isolated (QIAamp Viral RNA Mini Kit) and reverse transcribed, with the resultant viral cDNA amplified using the illustra GenomiPhi V2 DNA Amplification Kit (GE Healthcare). The sequence of the viral genome was then determined using semi-conductor sequencing (Ion Torrent PGM) at the Lotterywest State Biomedical Facility Genomics (University of Western Australia). Ion 314 chips were used to generate >200,000 reads of ≈100 bp. The sequence was assembled using Geneious Pro software and aligned with LR2006 OPY1 (Accession: DQ443544.2). Sequence changes are indicated below, changes highlighted in red. Percentages indicate the number of reads with the indicated nucleotide (threshold set at 2%) Three amino acid coding changes were identified.

| Nucleotide position           | Virus       | Nucleotide                    | Coding AA                    |
|-------------------------------|-------------|-------------------------------|------------------------------|
| 776                           | LR2006 OPY1 | A                             | K                            |
|                               | Parental    | G                             | E                            |
|                               | Rag100      | G                             | E                            |
| 1052                          | LR2006 OPY1 | A and G                       | M/V                          |
|                               | Parental    | G                             | V                            |
|                               | Rag100      | G                             | V                            |
| 4167                          | LR2006 OPY1 | A and G                       | D/G                          |
|                               | Parental    | A                             | D                            |
|                               | Rag100      | A                             | D                            |
| 4302                          | LR2006 OPY1 | A                             | Y                            |
|                               | Parental    | A                             | Y                            |
|                               | Rag100      | A(34%) & G(65%)               | C (nsP3 <sup>1409</sup> )    |
| 5049                          | LR2006 OPY1 | G and T                       | R/I                          |
|                               | Parental    | T                             | I                            |
|                               | Rag100      | T                             | I                            |
| 5903                          | LR2006 OPY1 | C                             | L                            |
|                               | Parental    | C                             | L                            |
|                               | Rag100      | C(34%) & T(66%)               | L                            |
| 6529                          | LR2006 OPY1 | A                             | V                            |
|                               | Parental    | A                             | V                            |
|                               | Rag100      | A(72%) & G(28%)               | V                            |
| 8978                          | LR2006 OPY1 | A                             | Q                            |
|                               | Parental    | A                             | Q                            |
|                               | Rag100      | G (96%)                       | R (E2 <sup>471</sup> )       |
| 9203                          | LR2006 OPY1 | A                             | K                            |
|                               | Parental    | A                             | K                            |
|                               | Rag100      | A(42%) & G(58%)               | K and R (E2 <sup>546</sup> ) |
| 11073                         | LR2006 OPY1 | A                             | L                            |
|                               | Parental    | A                             | L                            |
|                               | Rag100      | A(26%) & G(74%)               | L                            |
| 3' UTR; 11395 & 11421 & 11455 | LR2006 OPY1 | C                             |                              |
|                               | Parental    | C                             |                              |
|                               | Rag100      | C (13,27,33%) & T (87,73,67%) |                              |

**Figure S1C.** Integrated Genomics Viewer (IGV version 2.3.34 (41)) display of all the reads from the Ion Torrent output (map quality threshold 20, coverage allele frequency threshold 0.02). Coloured vertical lines on upper grey coverage graphs (log scale) match the nucleotide sites described in Fig. S1A. Mutations supported by 50-3000 independent reads, except UTR mutations supported by 6-15 independent reads. Lower black bars represent squished view of all Ion Torrent reads aligned to the CHIKV LR2006-OPY1 genome.

### CHIKV genome

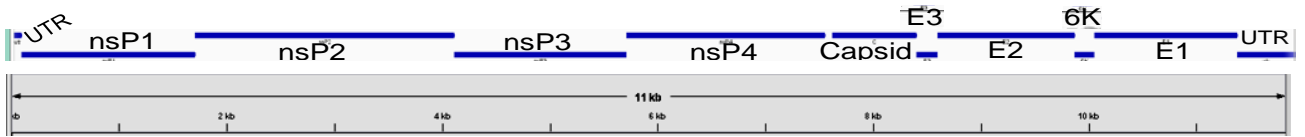

### Parental virus

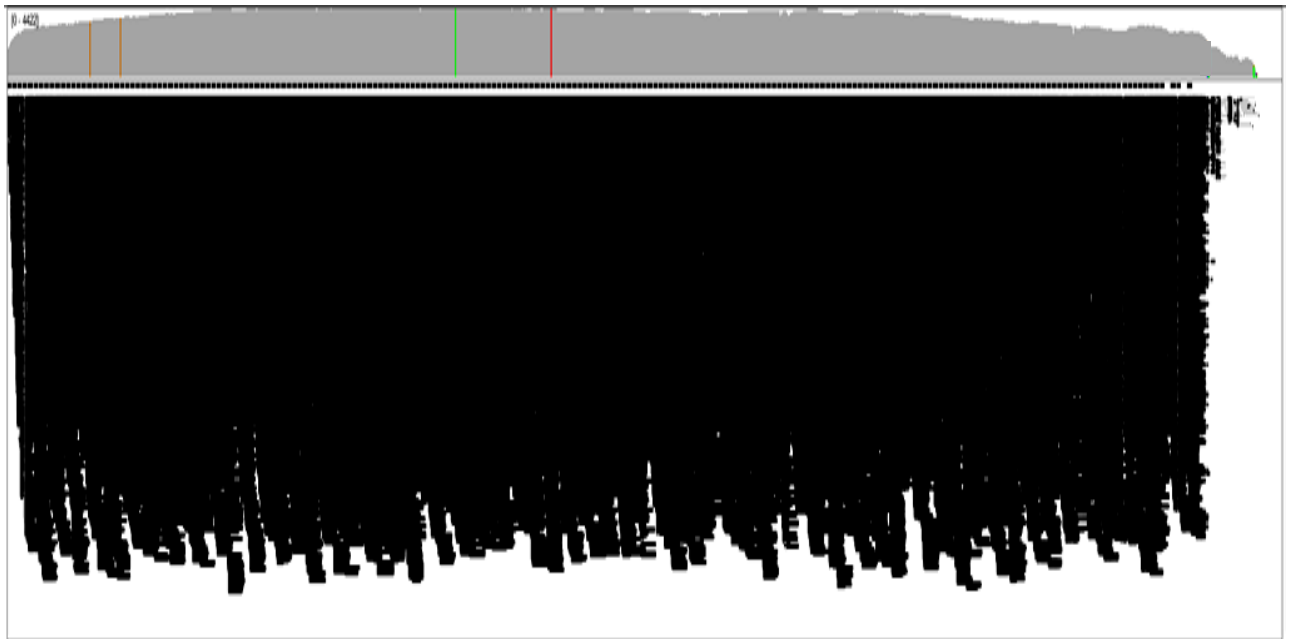

### RAG 100 virus

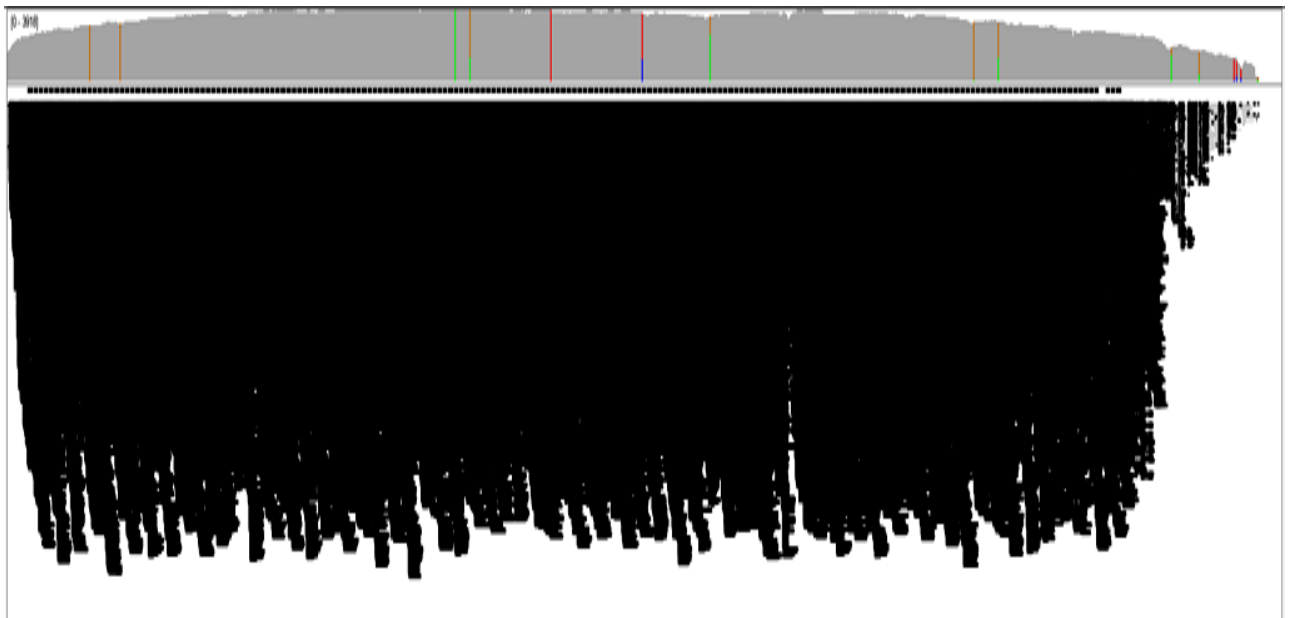

**Figure S2A.** H&E staining of feet after CHIKV infection of NOD mice showing inflammatory infiltrates in synovial membrane, muscle and dermis. Features are similar to those reported previously for C57BL/6 mice (Gardner et al., 2010). (a) Inflammatory infiltrate in the synovial membrane in NOD mice day 7 post infection. (b) Inflammatory infiltrate in muscle in NOD mice day 7 post infection. (c) Inflammatory infiltrate in dermis in NOD mice day 7 post infection. (\* edema).

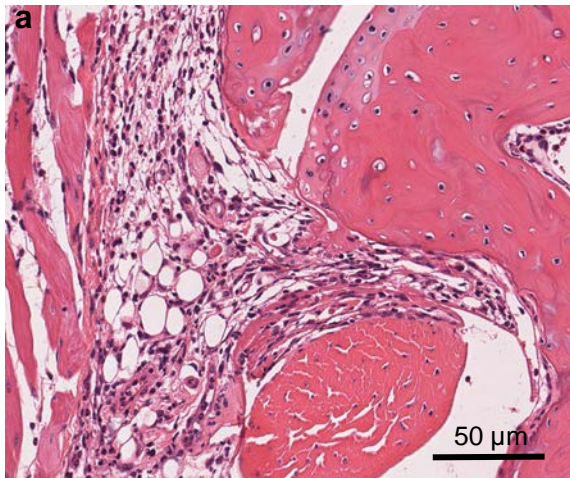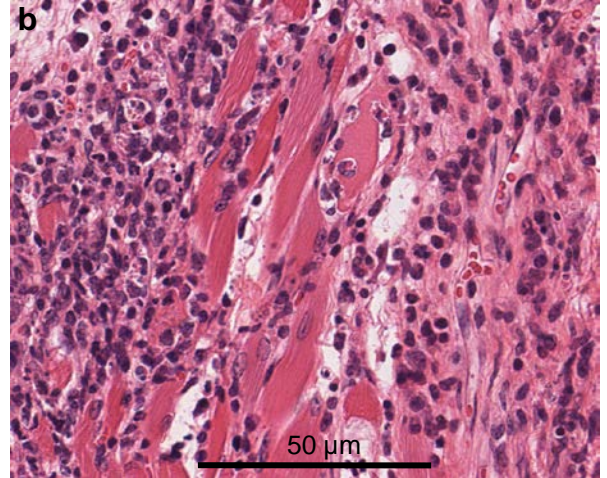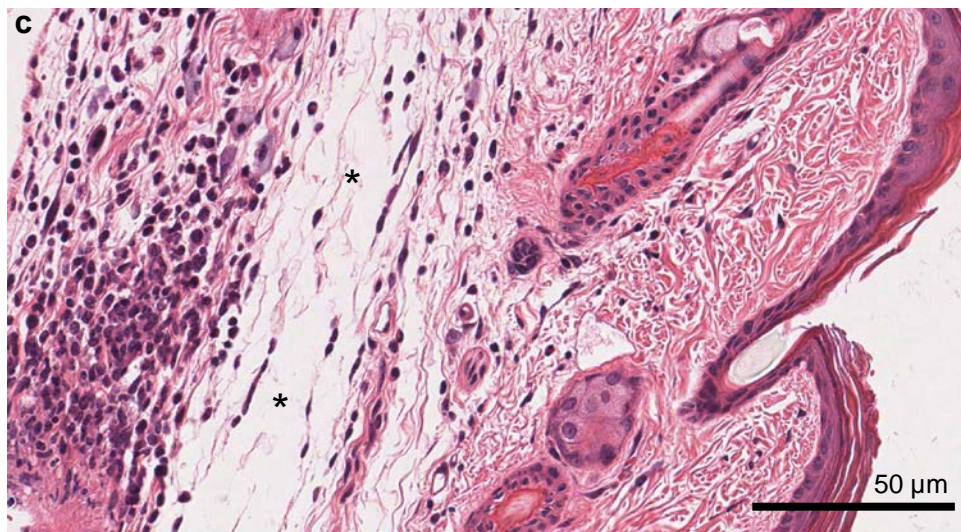

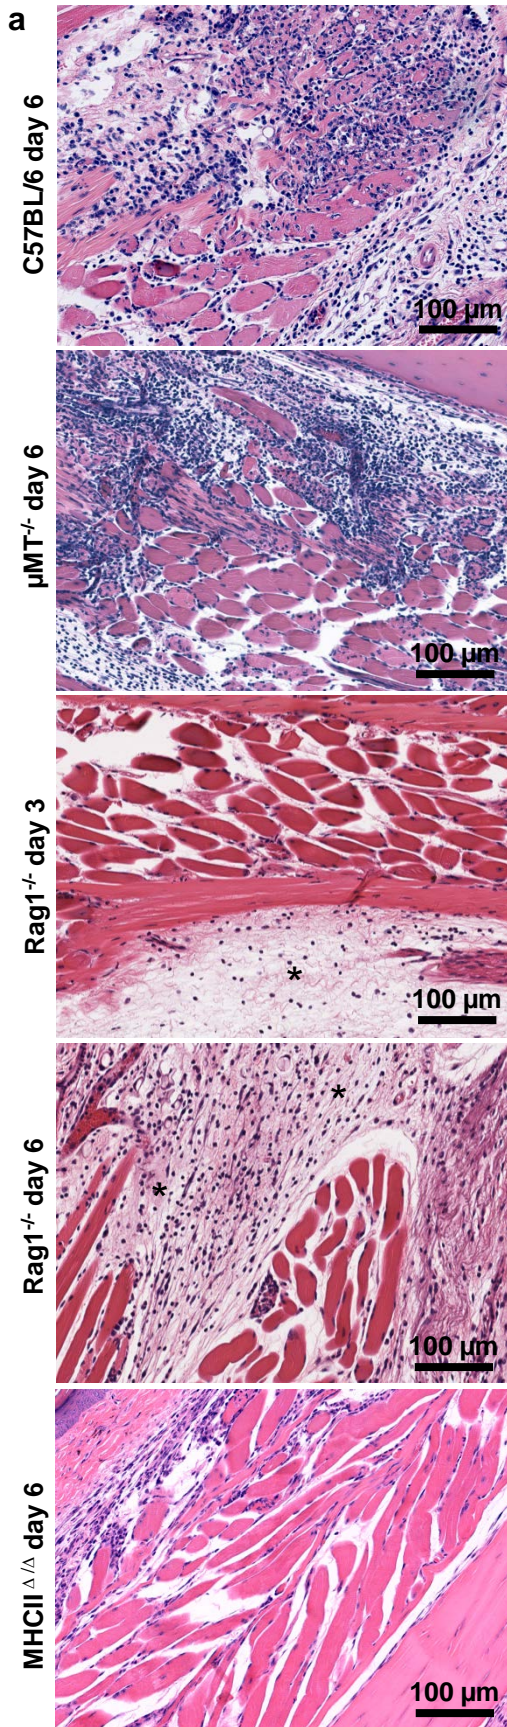

**Figure S2B.** Quantitation of cellular infiltrates in C57BL/6, Rag1<sup>-</sup>,  $\mu$ MT, and MHCII <sup>$\Delta/\Delta$</sup>  mice. (a) H&E staining of feet from the indicated mouse strains at the indicated times. (\*) indicated edema.

(b) Image analysis of digitally scanned whole foot sections (as described Gardner et al 2010) using Aperio ImageScope Software (v10) and the Positive Pixel Count v9 algorithm (Strong blue, default settings). Strong blue measures nuclear staining and is thus a measure of the number of infiltrating cells. Mean of n = 4 feet per are shown. Statistics by Mann Whitney U and Kolmogorov Smirnov tests.

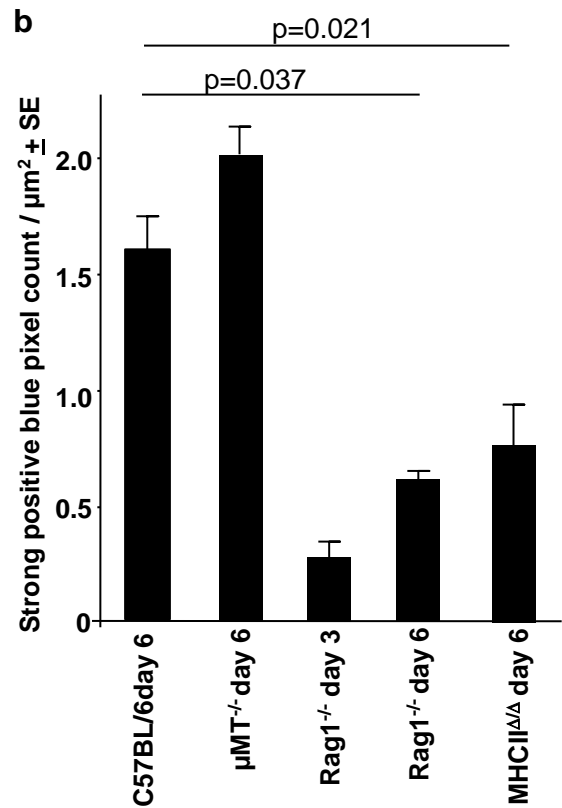

**Figure S3.** Early loss of viraemia control in B cell deficient mice and neutralising antibody responses in C57BL/6 mice. (a) Viraemia in B cell-deficient C57BL/6 mouse strains begins to be higher than C57BL/6 mice as early as day 3 post infection. This graph uses a subset of the data shown in Fig. 1, with data for the 4 indicated mouse strains plotted on one graph and the x axis restricted to day 0 to day 7. (b) Neutralisation titre against CHIKV in C57BL/6 mice determined as described (Wang et al. 2011. Vaccine 29;2803-2809); n=3-6 mice per time point.

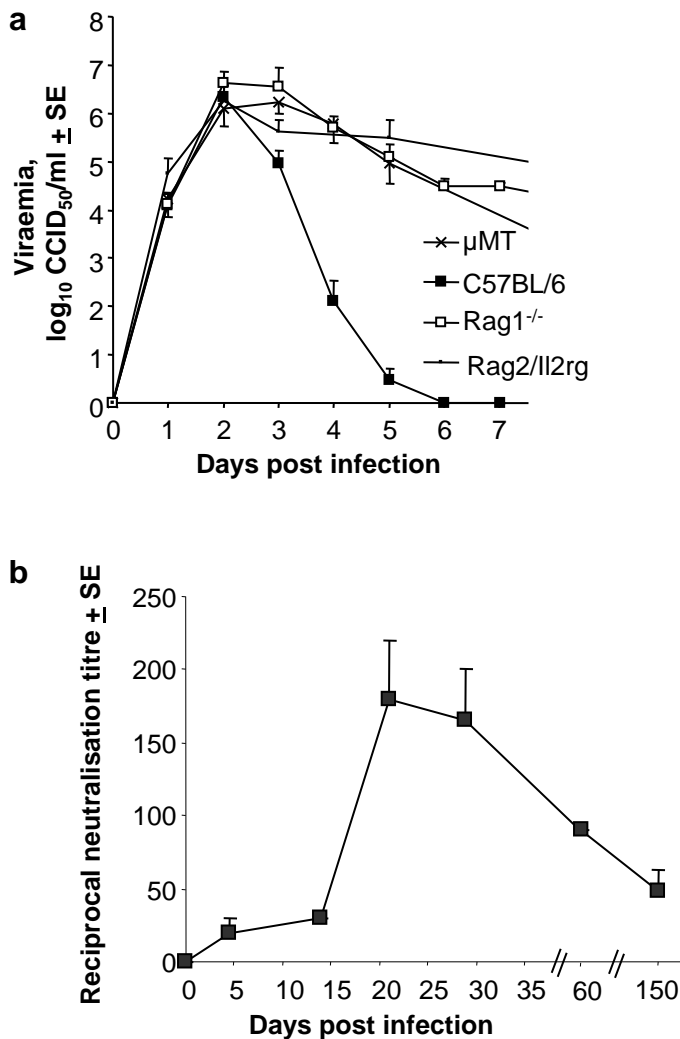

**Figure S4.** Viraemia and foot swelling in  $Fc\gamma R^{-/-}$  mice.  $Fc\gamma R$ -common gamma chain-deficient mice ( $Fc\gamma R^{-/-}$ ) on a C57/BL6 background (Taconic, B6.129P2-Fcer1g<sup>tm1Rav</sup> N12) were infected with CHIKV and viraemia (left) and foot swelling (right) measured. The common gamma chain ( $Fc\gamma R$ ) is required in mice for expression of all  $Fc\gamma R$ , except the inhibitory  $Fc\gamma RIIB$ .

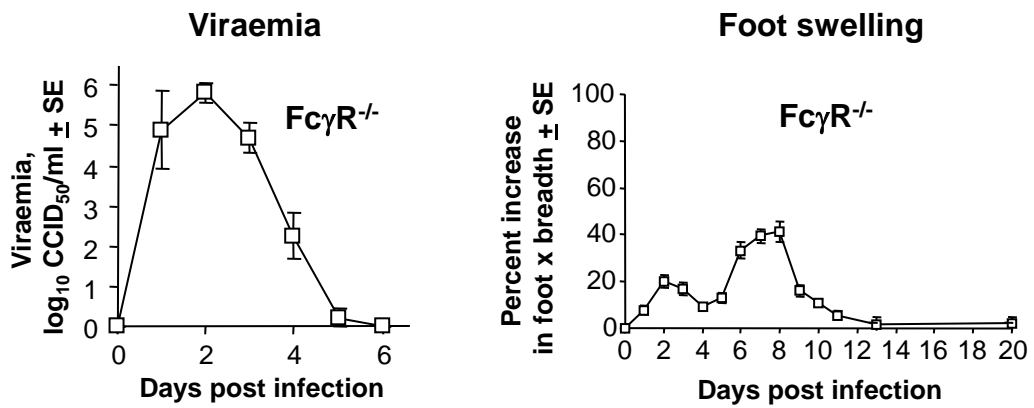

**Figure S5.** Histopathological modifications in spleen of chronically CHIKV infected Rag1<sup>-/-</sup> mice. H&E staining of spleen of uninfected Rag1<sup>-/-</sup> mice (left hand panels) and chronically infected Rag1<sup>-/-</sup> mice, day 430 post infection (right hand panels). The spleens of uninfected mice contained few polymorphonuclear leukocytes, whereas in the chronically infected mice granulocytosis (increased numbers of polymorphonuclear leukocytes) and granulopoiesis (as demonstrated by the presence of numerous doughnut-shaped cells) was evident.

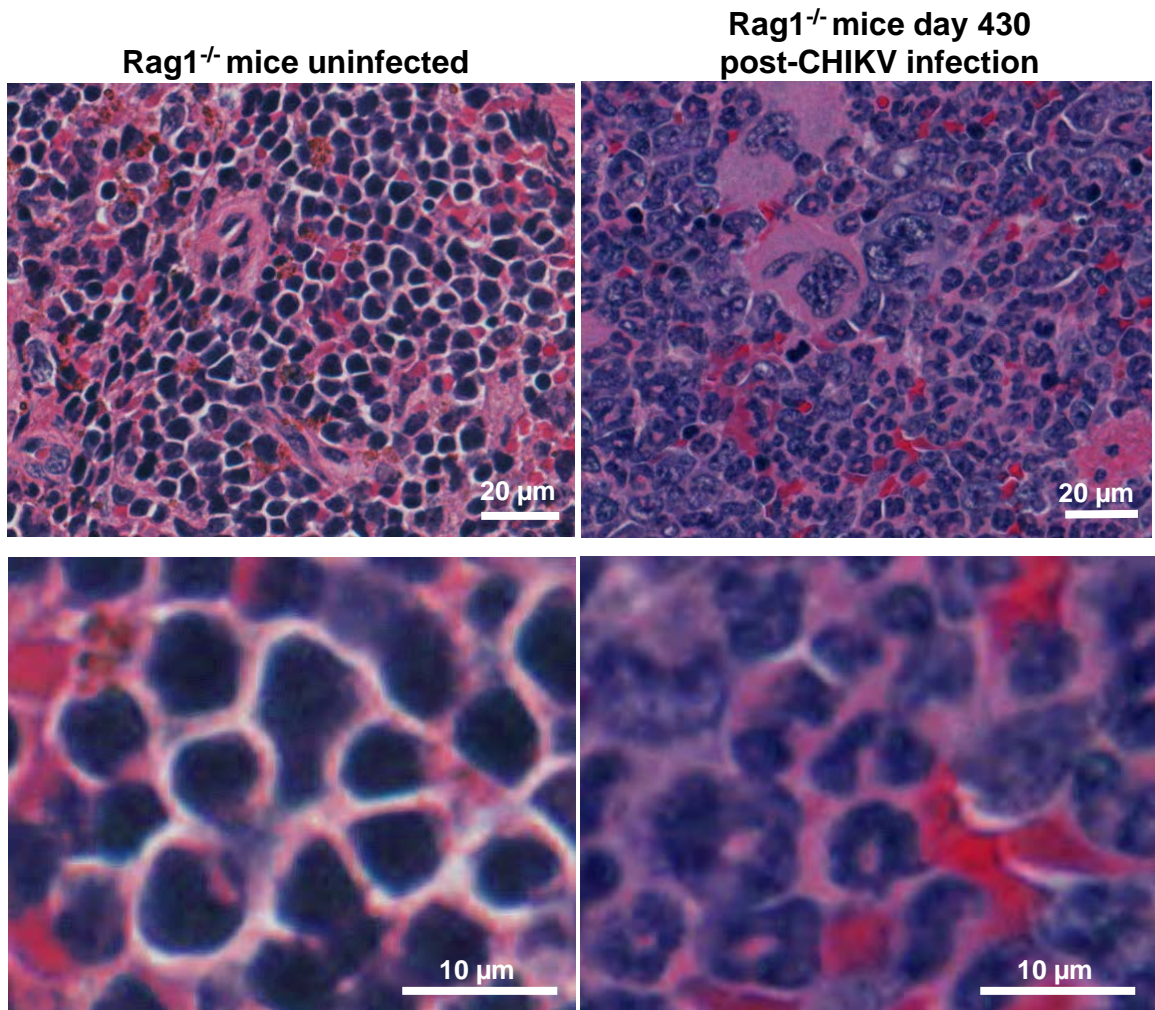

**Figure S6.** Survival of NRG mice post CHIKV infection. Kaplan Meier survival plot of infected NRG mice. Mice were euthanised according animal ethics guidelines when symptoms were considered obvious but moderate. n=5 mice per group.

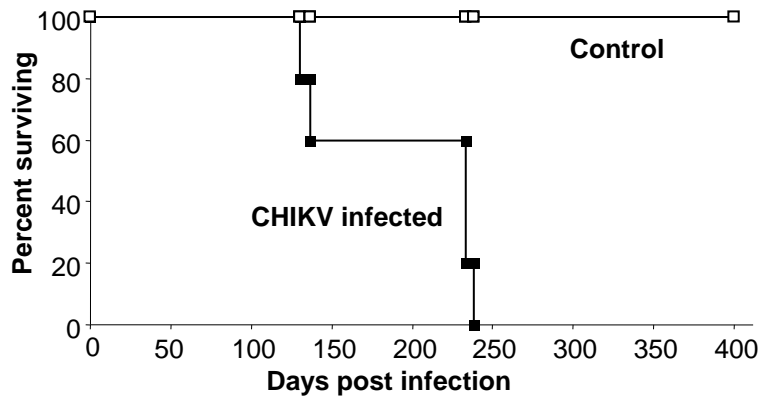



**Figure S7A.** Brain lesions in NRG mice with neurological symptoms requiring euthanasia. (a) Low magnification H&E staining of the brain of NRG mouse with CHIKV-induced neurological symptoms requiring the animals to be euthanized. Arrows indicate pale foci near ventricles (corpus callosum, striatum), in the thalamus, and in Ammon's horn. (No additional lesions were seen with Luxol Fast Blue staining: there was no evidence of demyelination). (b) High magnification of a pale foci, showing the foci correspond to areas of vacuolisation and edema. The cell density depicted here is illustrative of diffuse reactive gliosis. (c) In or near the vacuolated foci gemistocytic astrocytes, with abundant hyalin eosinophilic cytoplasm and large clear nucleus, were evident (black arrowhead). Some activated microglial cells were also present (arrows). Dark staining neurons within the damaged parenchyma (suggestive of cell death) were also seen (open arrowhead).

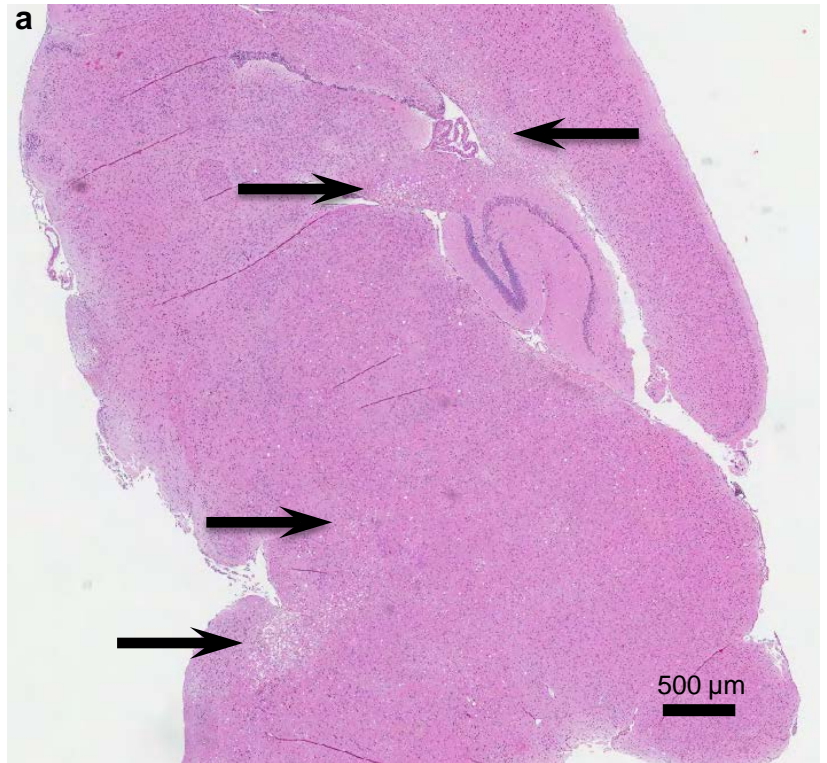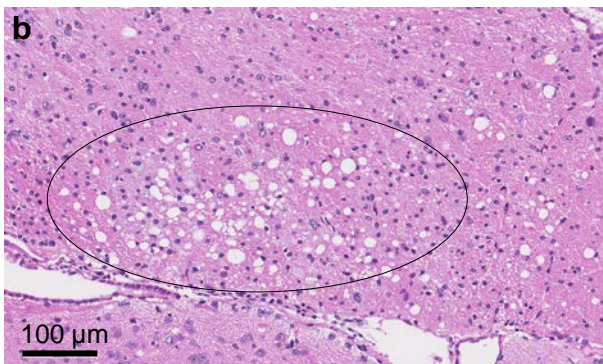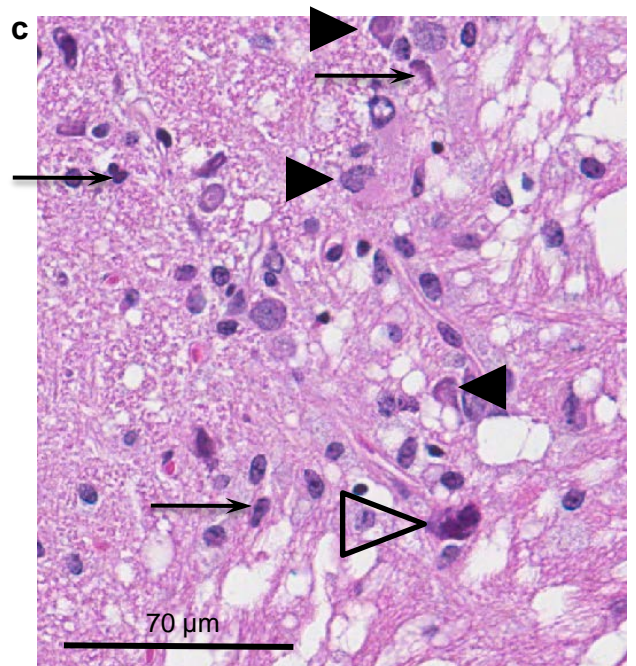

**Figure S7B.** Immunohistochemical staining of CHIKV capsid protein in brain tissue of CHIKV infected NRG mice with neurological symptoms requiring euthanasia day 228 post infection. Paraffin sections were stained with a new anti-CHIKV monoclonal antibody (5.5G9) that recognizes the CHIKV capsid protein (Goh et al, submitted). Red staining (chromogen-substrate, 3-amino-9-ethylcarbazole) indicates the presence of capsid antigen. Staining protocol as described in Goh et al. 2013 (Clin Immunol. 149(3):487-97). (a) CHIKV positive cells in Ammon's horn, with morphology consistent with neurons and oligodendrocytes. (b) CHIKV positive cells in the Bulbus olfactorius, with morphology consistent with neurons. (c) CHIKV positive cells in the white matter, morphology consistent with oligo-dendrocytes (d) Isotype control, NRG mouse brain day 228 post infection. (e) Isotype control, NRG mouse brain day 228 post infection. (f) Aperio ImageScope software (v10) and the Positive Pixel Count v9 algorithm was used as described (Poo et al, 2014) to quantitate red capsid staining. Anti-capsid antibody staining showed  $\approx 100$  fold more red pixels than staining of the same tissue with an isotype control or anti-capsid staining of brain from C57BL/6 mice, which do not show neurological symptoms.

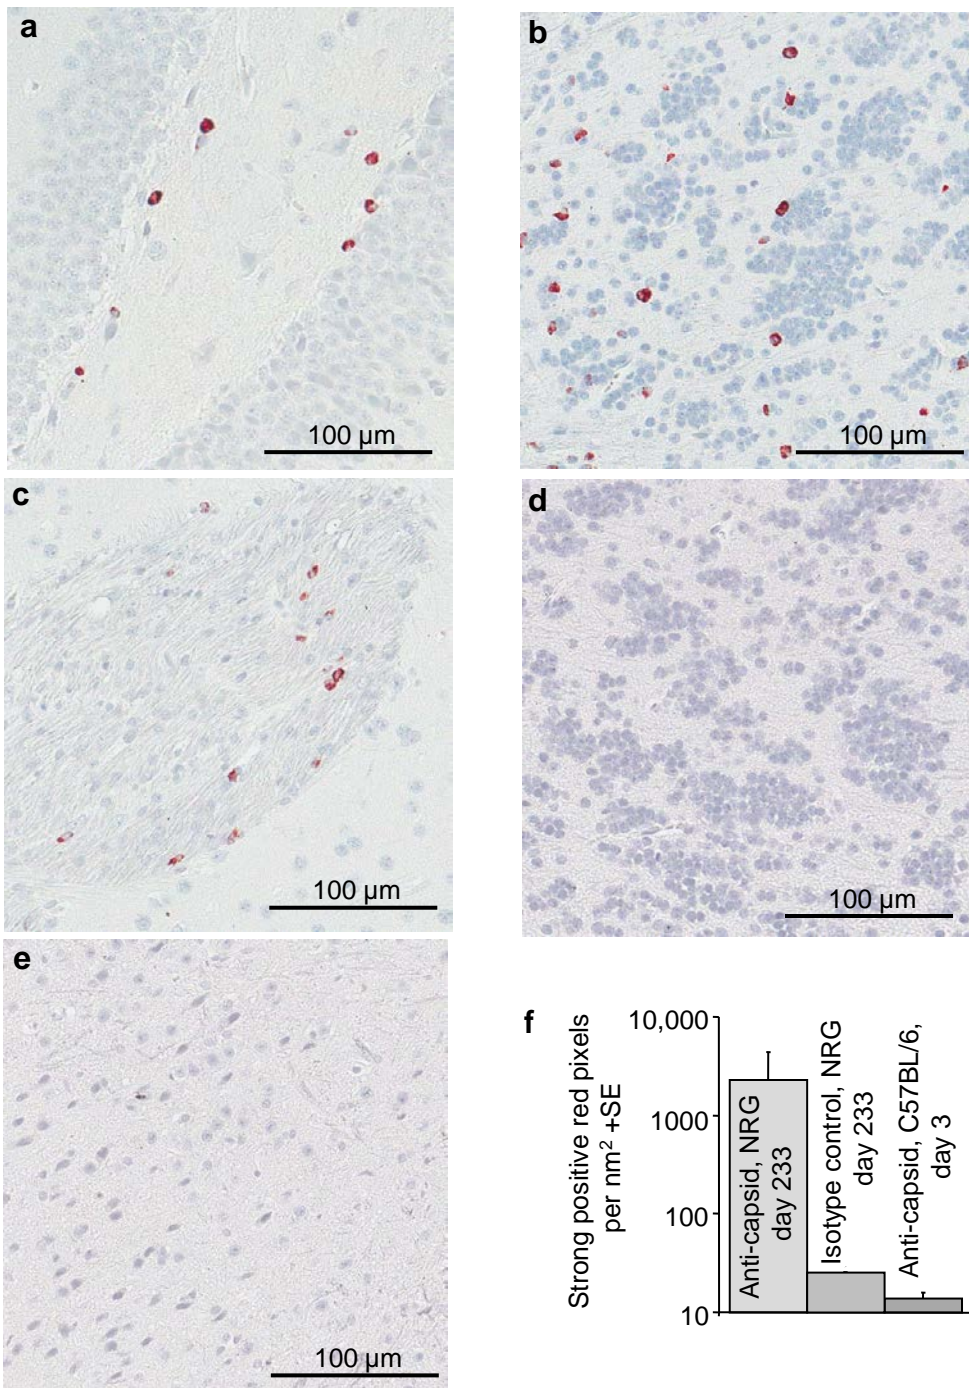

**Figure S8A.** No persistent CHIKV RNA in spleen. qRT-PCR analysis of whole spleens taken at the indicated times post infection and analysed as for Fig. 5A and at the same time as samples from feet (to provide positive controls). n= 6, 2, 4 and 4 for the indicated days, respectively.

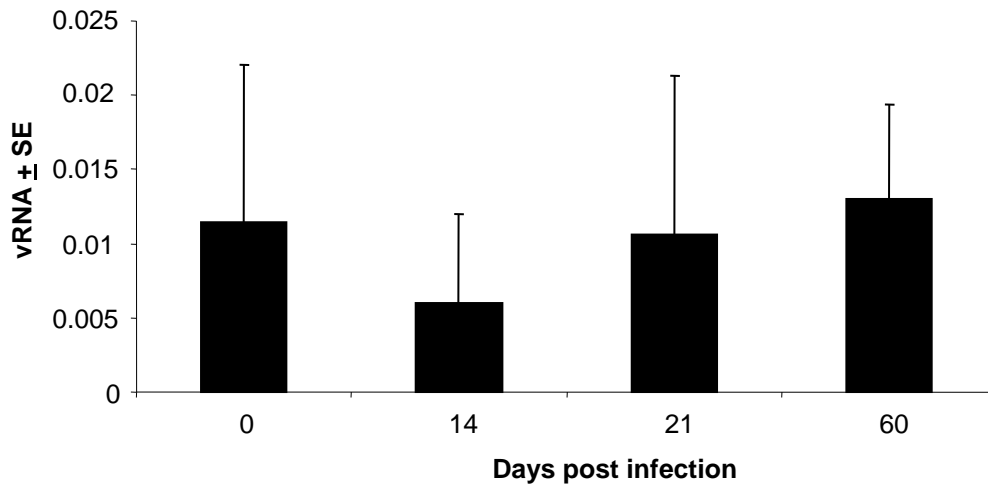

**Figure S8B.** Curve fitting of decline in persistent post-viraemic CHIKV RNA in wild-type mouse feet over time. CHIKV RNA data from Figure 5A and B, showing viraemic period (yellow) and curve fit for (i) RNA levels (measured by standard qRT PCR) and (ii) negative strand RNA (-RNA) levels, from day 14 onwards. Day 100 for -RNA was excluded as an outlier. (Distinct methods were used to measure RNA and -RNA, thus the different y values for RNA and -RNA cannot be used to compare RNA and -RNA levels. Similarly, where  $y=ae^{-x}$ , differences in “a” reflect differences in the methods used).

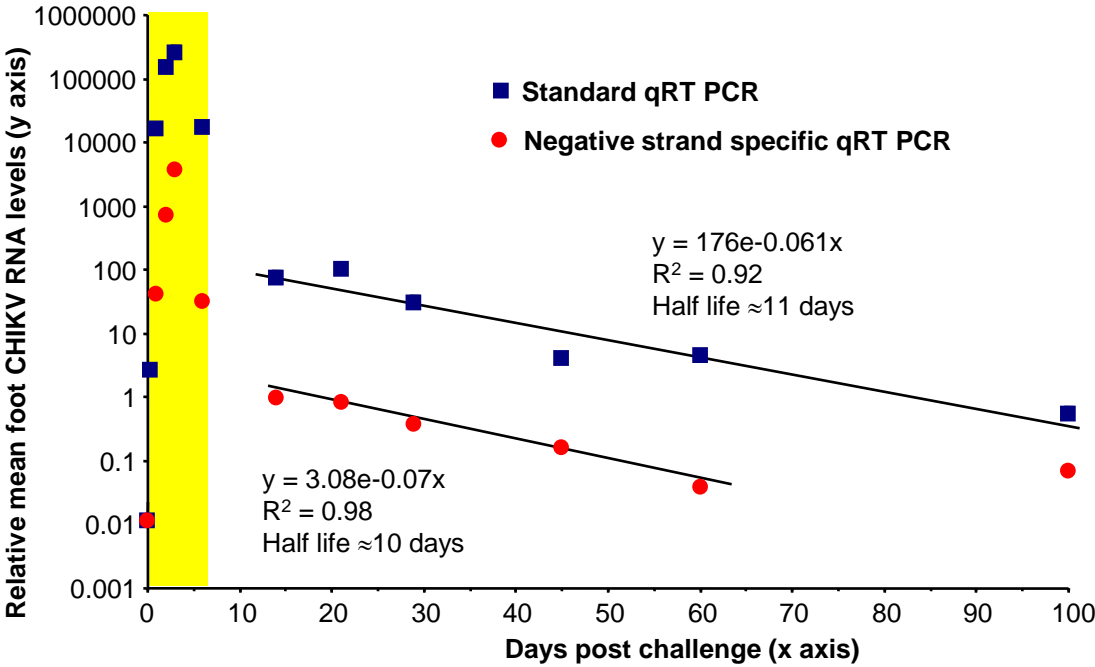

**Figure S9.** Persistence of viral antigen in feet of CHIKV infected mice. Immunohistochemical staining of paraffin sections of feet with new anti-CHIKV capsid monoclonal antibody (5.5G9) as described (Goh *et al.* submitted). Red staining indicates presence of antigen; 9 images are shown for day 30 (same magnification for all images) (left), isotype control and an uninfected control are shown (right).

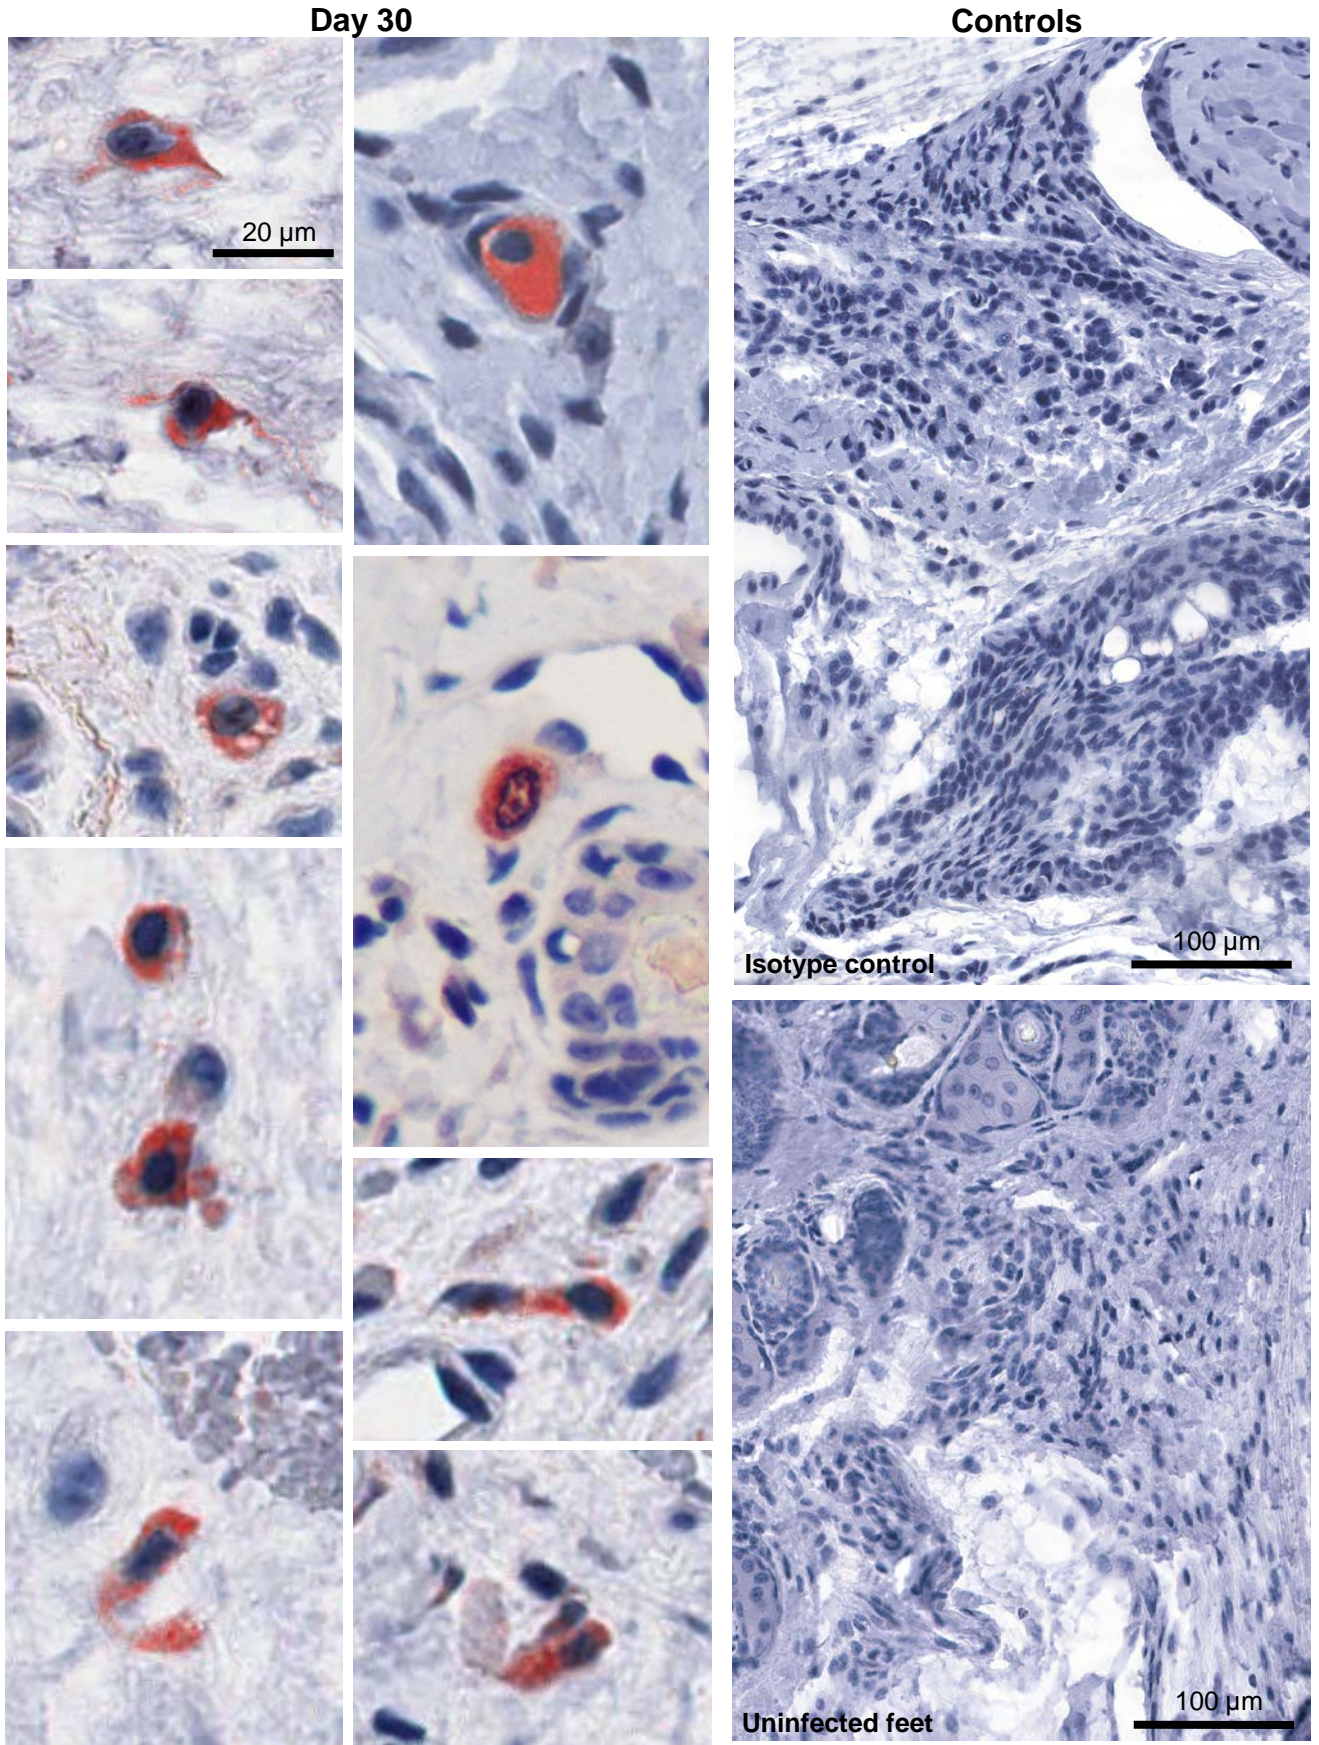

**Figure S10A.** Principal component analysis of 4,805 filtered genes identified by microarray analysis of feet of wild-type mice day 0 and 30 post infection. Microarray analysis was conducted as described (Nakaya et al, 2012) comparing feet from day 0 and day 30 post-infection with CHIKV. Probe sets that did not represent known genes were removed and only expressed genes with a mean  $\log_2$  expression  $\geq 6$  and variance  $> 0.1$  across all 4 samples were included. The former removed genes with overall low expression. The later removed genes whose expression changed little regardless of infection and were thus deemed uninformative. Expression was normalized by z-score. Red squares – two day 30 samples (from 3 pooled feet), black squares - two day 0 samples (from 3 pooled feet). 4,805 filtered genes were used for the PCA; 1,000 clusters were used for PCA calculation.

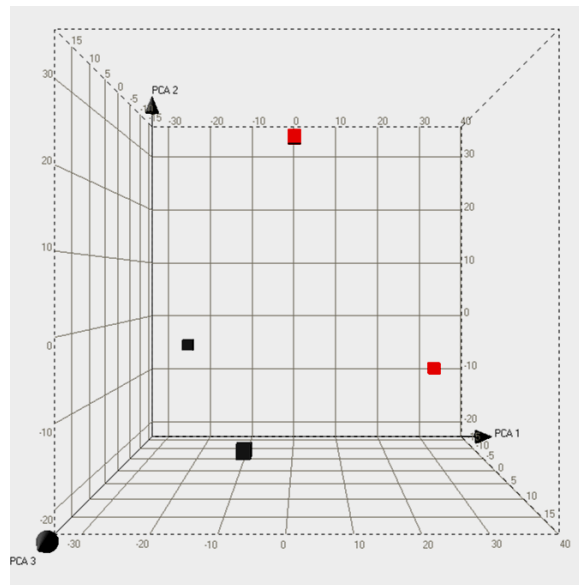

**Figure S10B.** Heat map of 192 significantly up-regulated genes identified by microarray analysis of feet of wild-type mice day 30 post infection. Of the 4,805 filtered genes identified above, 192 genes were significantly up-regulated on day 30 compared with day 0 (t test  $p < 0.05$ ). A heat map of the 192 genes identified is shown. No FDR was performed.

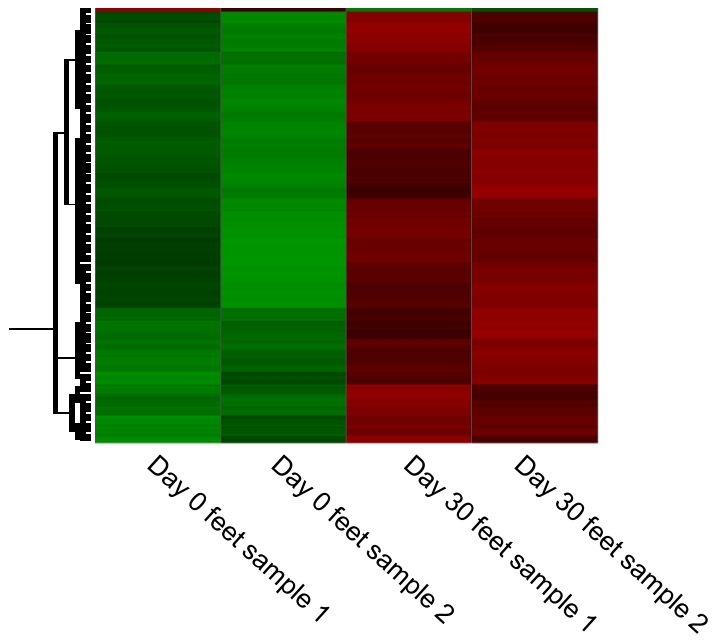

**Figure S10C.** qRT PCR of Granzyme B and FcγR4 at days 0, 7 and 30 post infection with CHIKV. n=3-6 feet/mice per time point. Statistics by Kolmogorov-Smirnov test. Primer sequences: GranB, F 5'- CAC TCT TGA CGC TGG GAC C -3', R 5'- GAG CAG CAG TCA GCA CAA AG -3; FcγR4 F 5'- TTC AGC AGC ATG TGG CAG -3', R 5'- AAC CAC TTG ATAGAA TTG TCC TCG -3'.

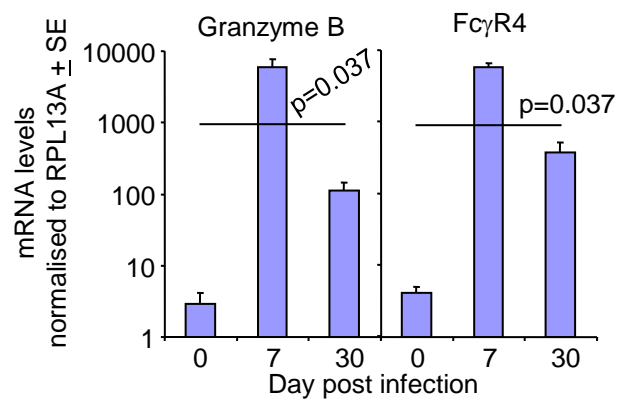



**Figure S11.** Ingenuity canonical pathway analysis of the 192 genes up-regulated in feet of mice at day 30 post infection. The pathways have been grouped into themes as described previously for pathways identified on day 7 post infection (Nakaya et al. 2012).  $-\log(p \text{ value}) > 1.3$  represents  $p < 0.05$ .

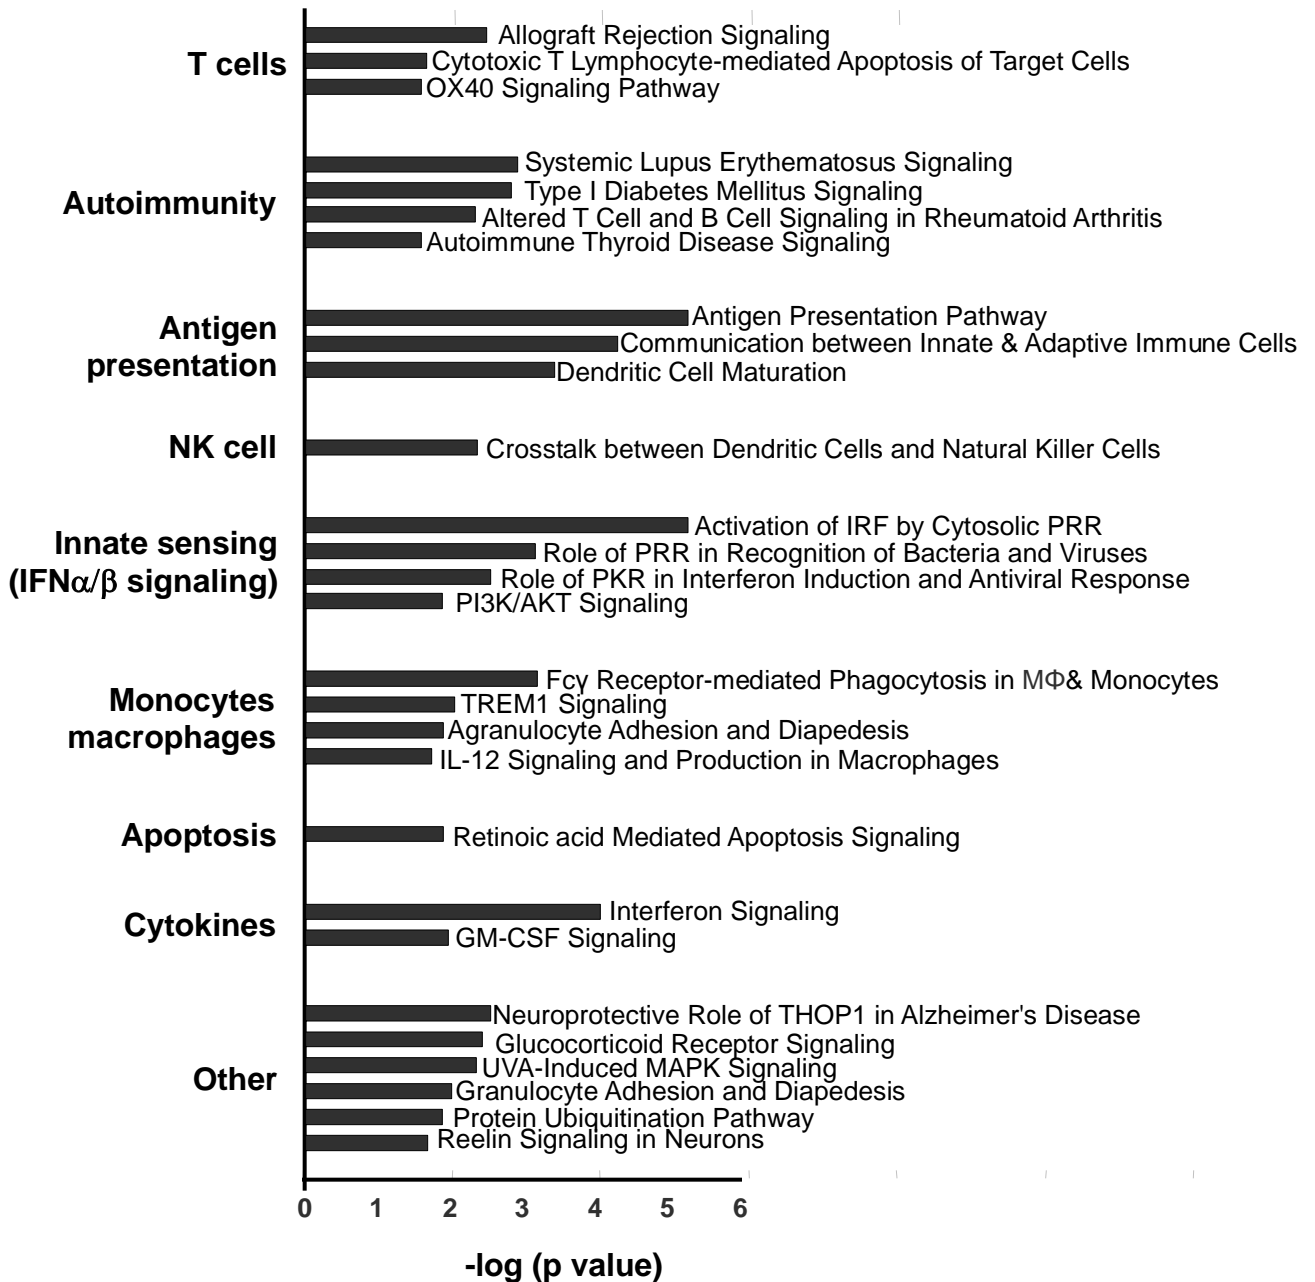

Supplement: pntd.0003354.s001.pdf [file pntd.0003354.s001.pdf]
